# Supplementary material for: Microwave-Assisted Stereoselective Heterocyclization to Novel Ring d-fused Arylpyrazolines in the Estrone Series
Source: MDPI journal article supplement (doi:10.3390/molecules24030569), 2019-02-04

Supplementary material

for

**Microwave-assisted stereoselective heterocyclization to novel ring D-fused arylpyrazolines in  
the estrone series**

Gergő Mótyán, Barnabás Molnár, János Wölfling, Éva Frank

*Department of Organic Chemistry, University of Szeged, Dóm tér 8, H-6720 Szeged, Hungary*

\*Corresponding author. E-mail address: frank@chem.u-szeged.hu

**Table of Contents**

|                                                                                                  |        |
|--------------------------------------------------------------------------------------------------|--------|
| Spectral data ( $^1\text{H}$ NMR, $^{13}\text{C}$ NMR, and 2D NMR) of the synthesized compounds. | S2-S22 |
|--------------------------------------------------------------------------------------------------|--------|

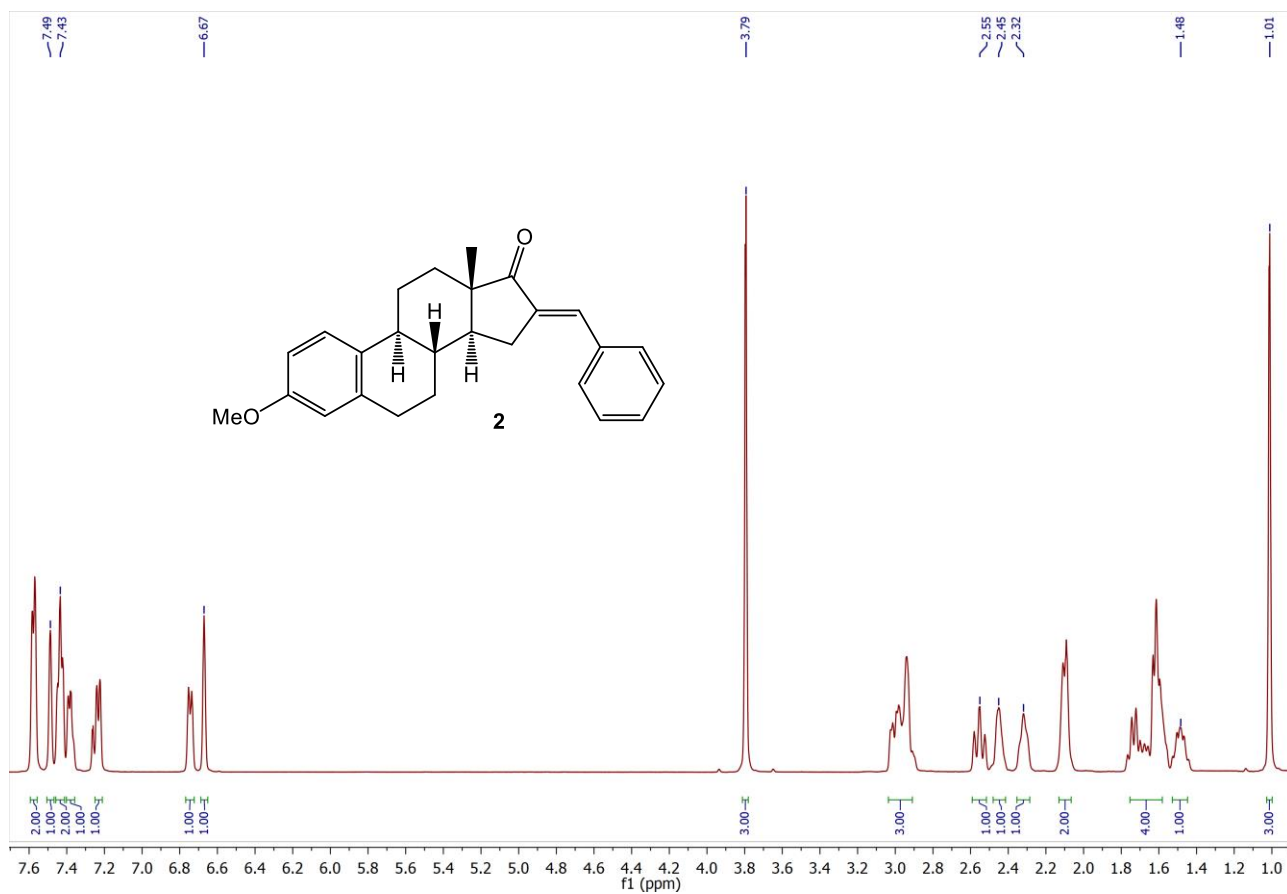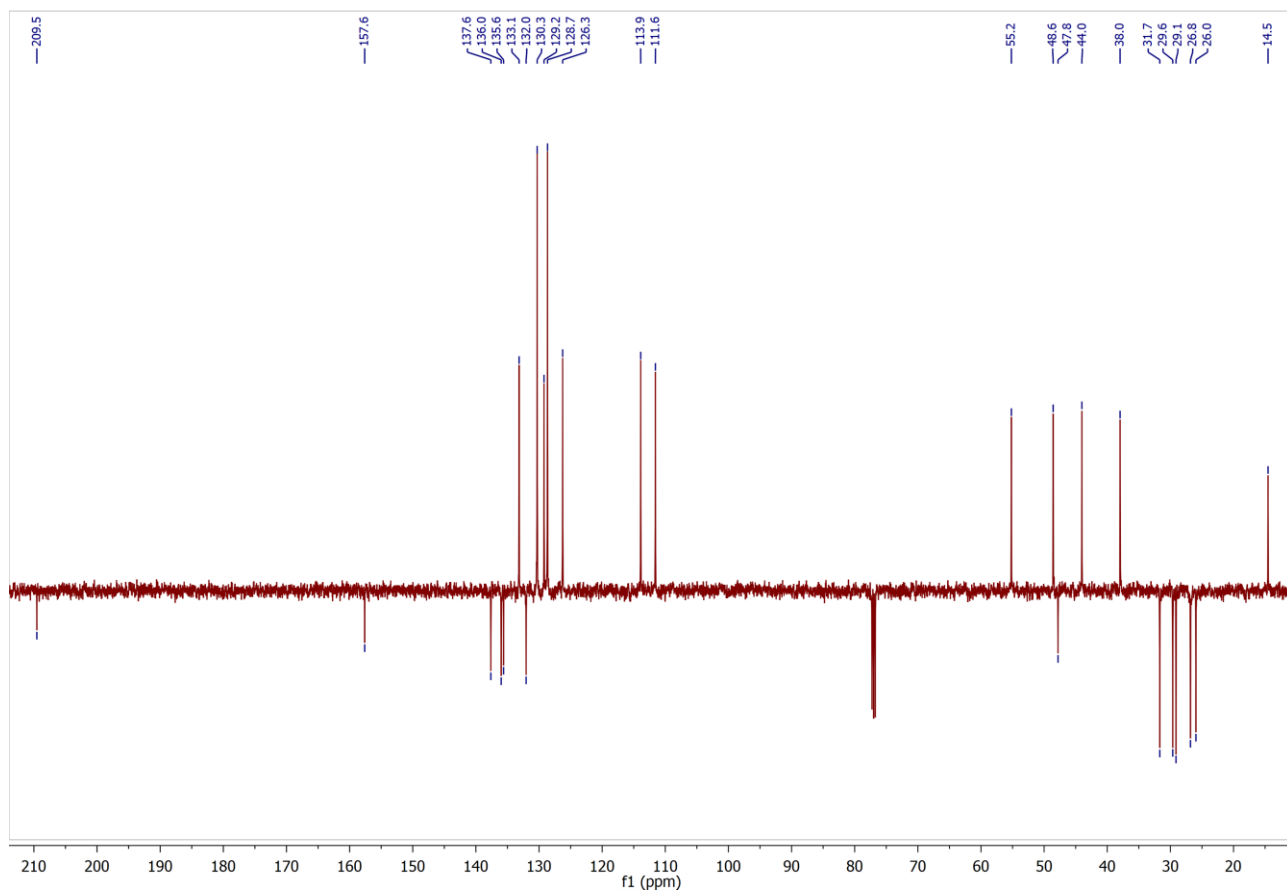

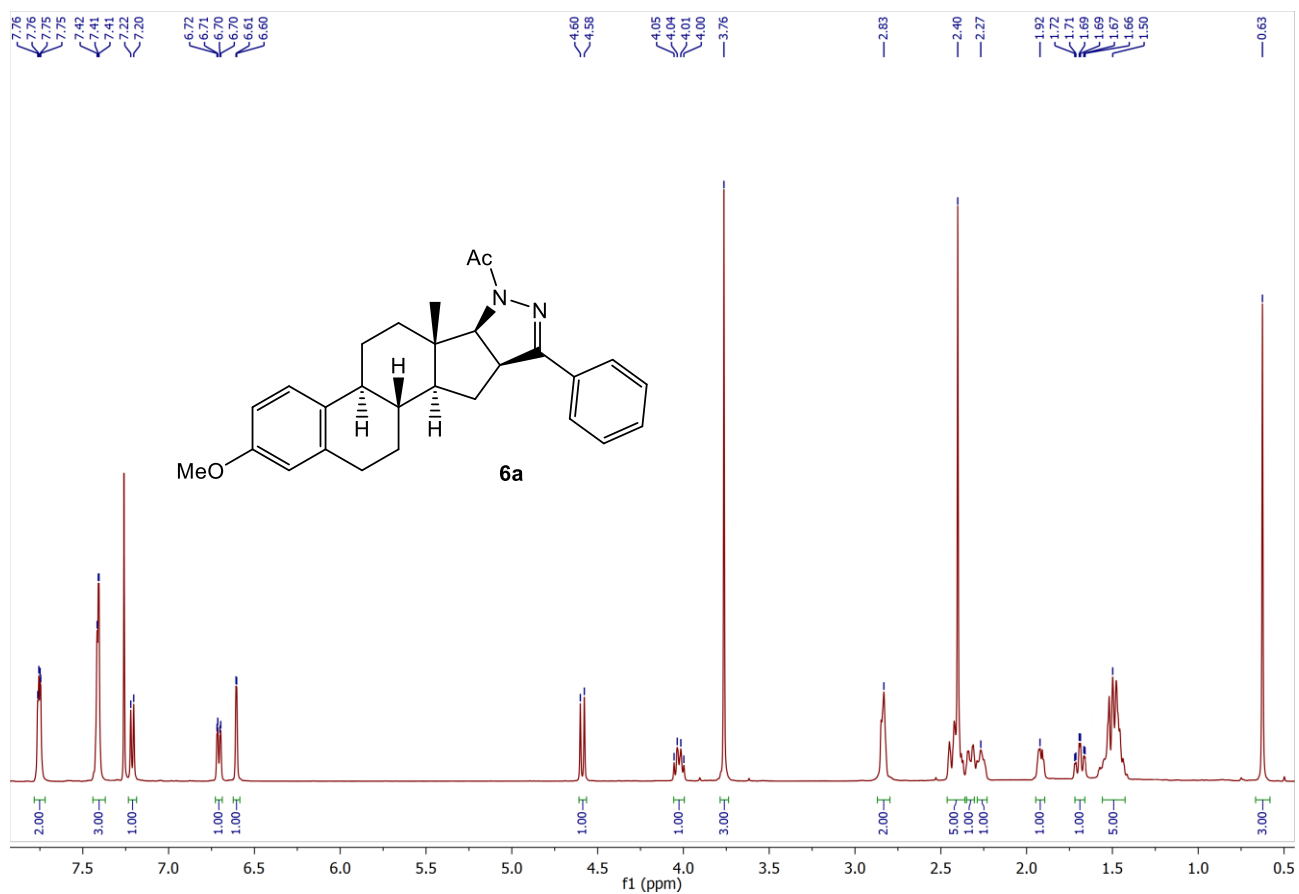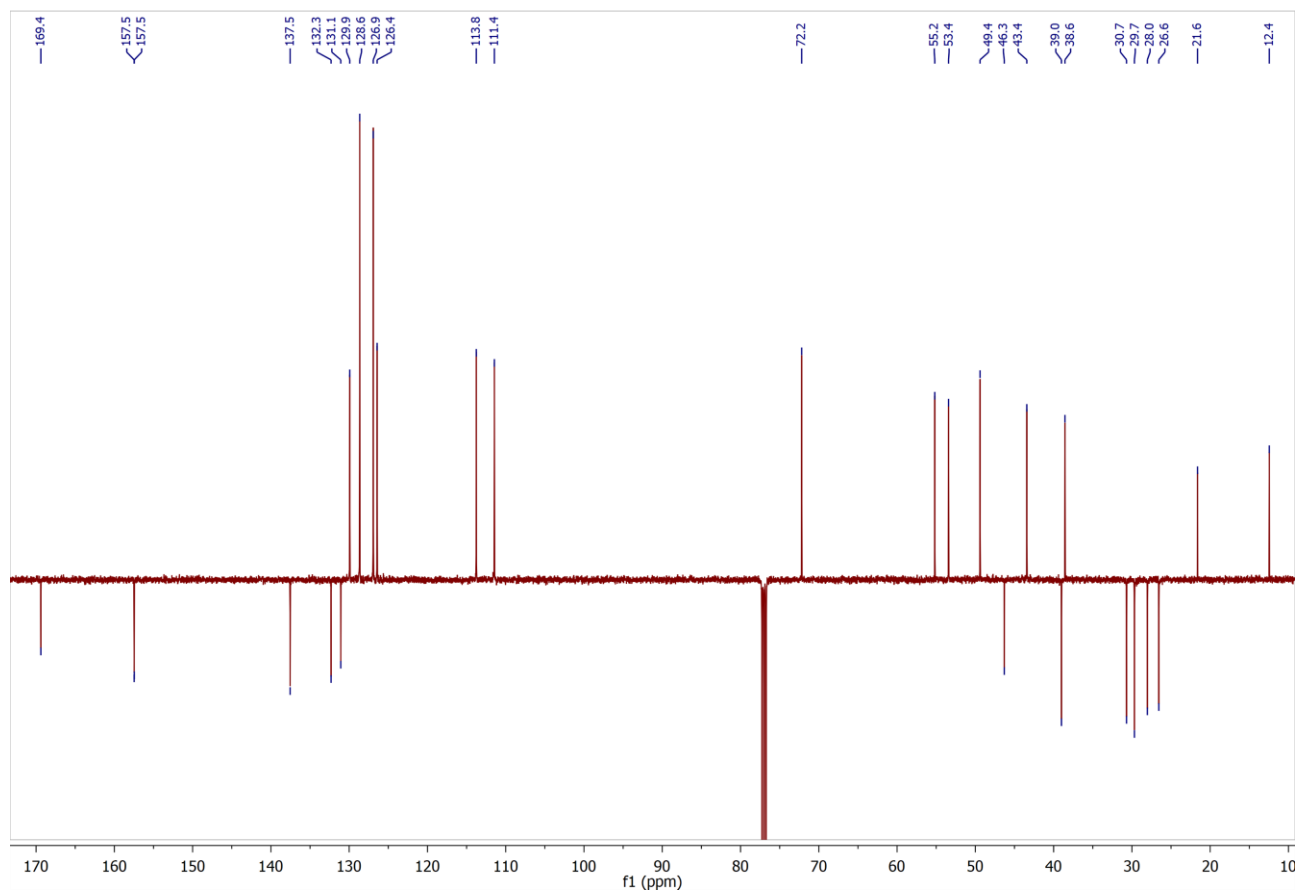

HSQC spectrum of **6a**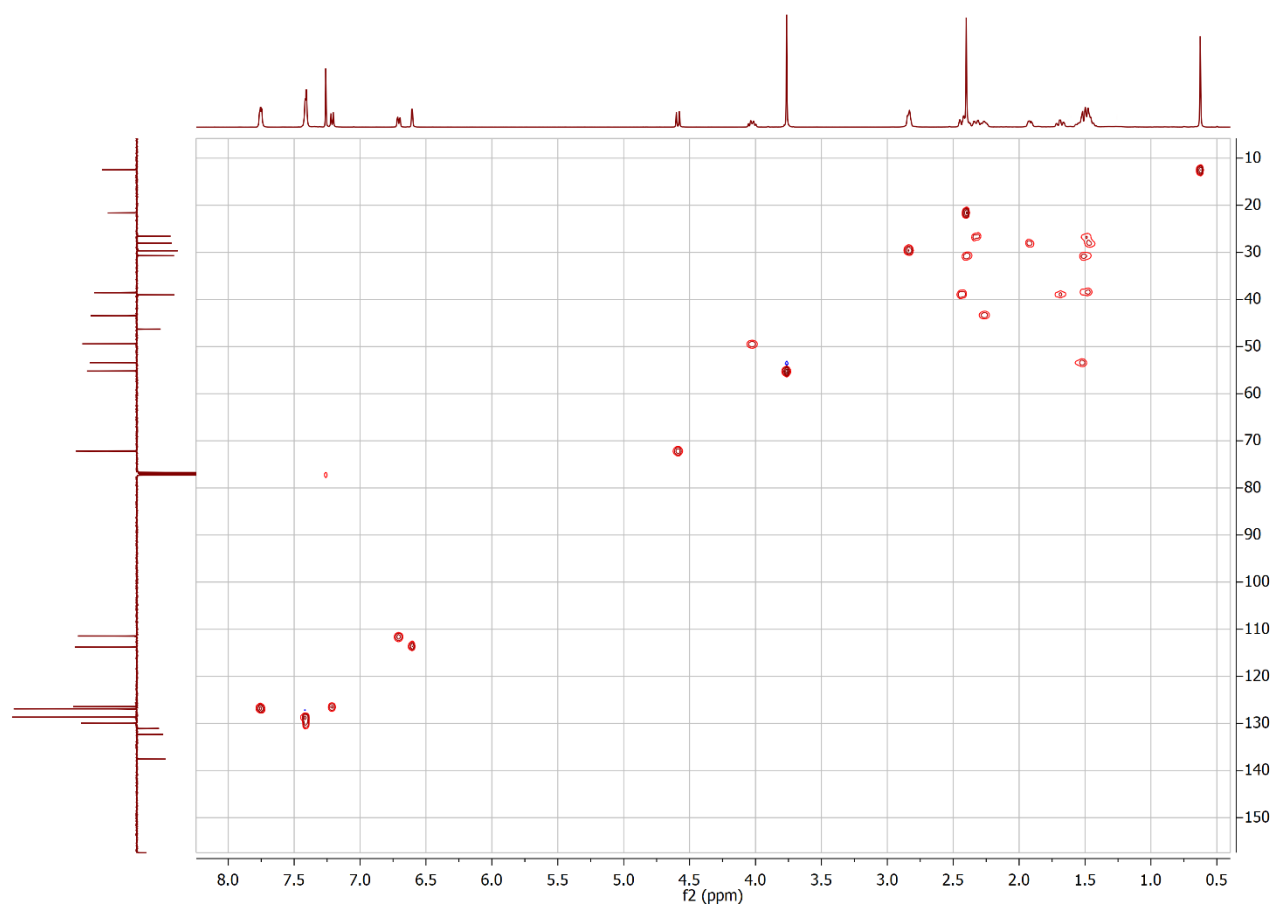HMBC spectrum of **6a**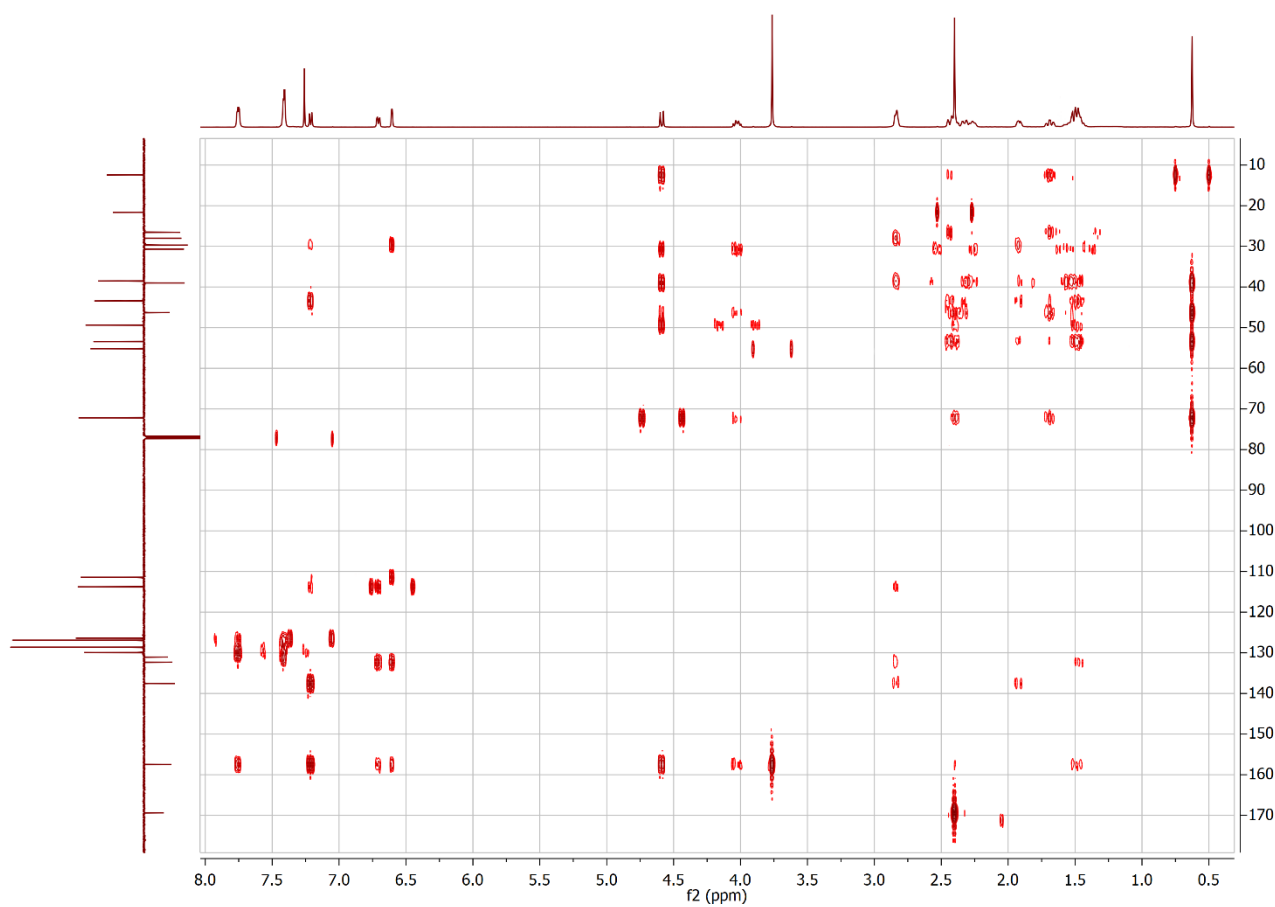

NOESY spectrum of **6a**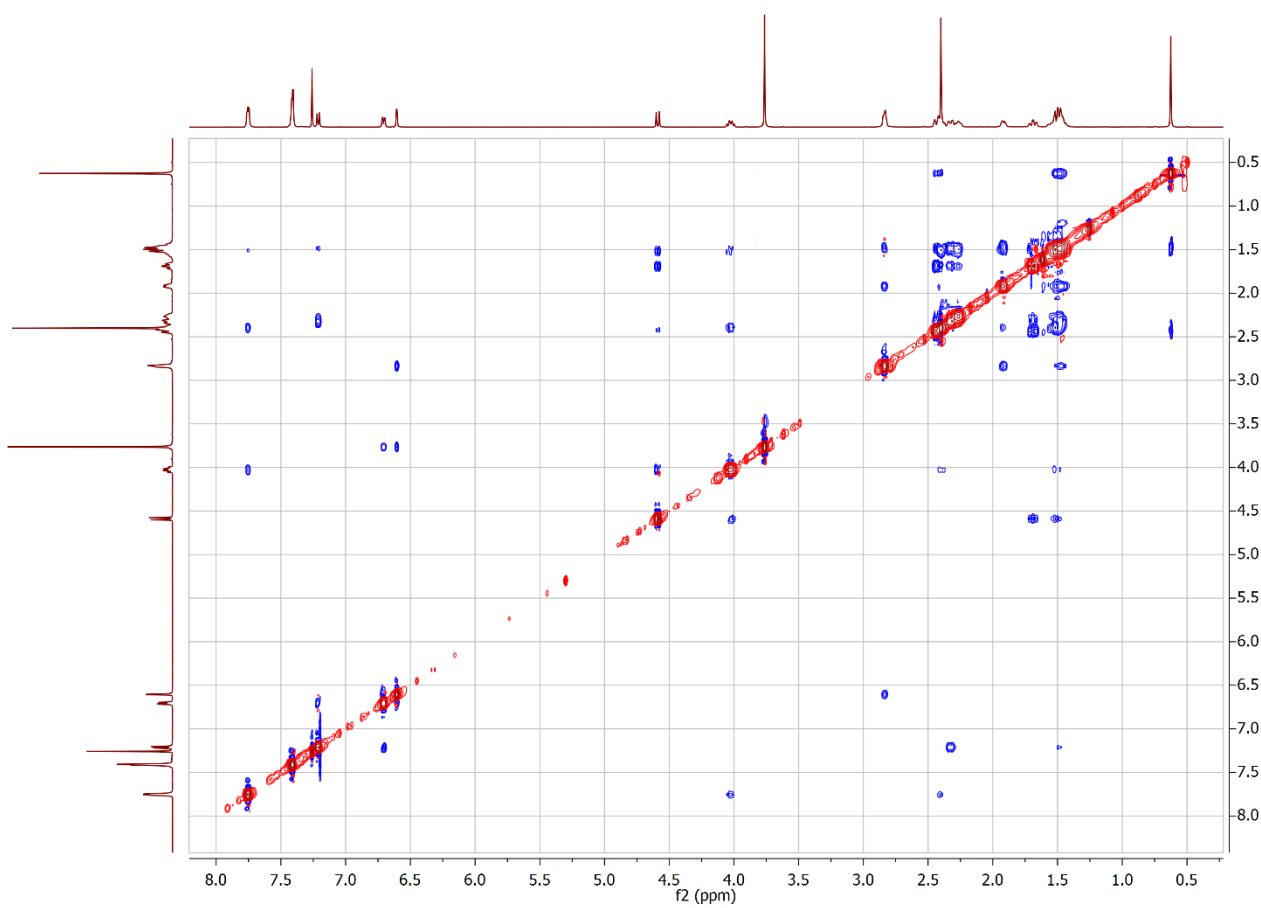COSY spectrum of **6a**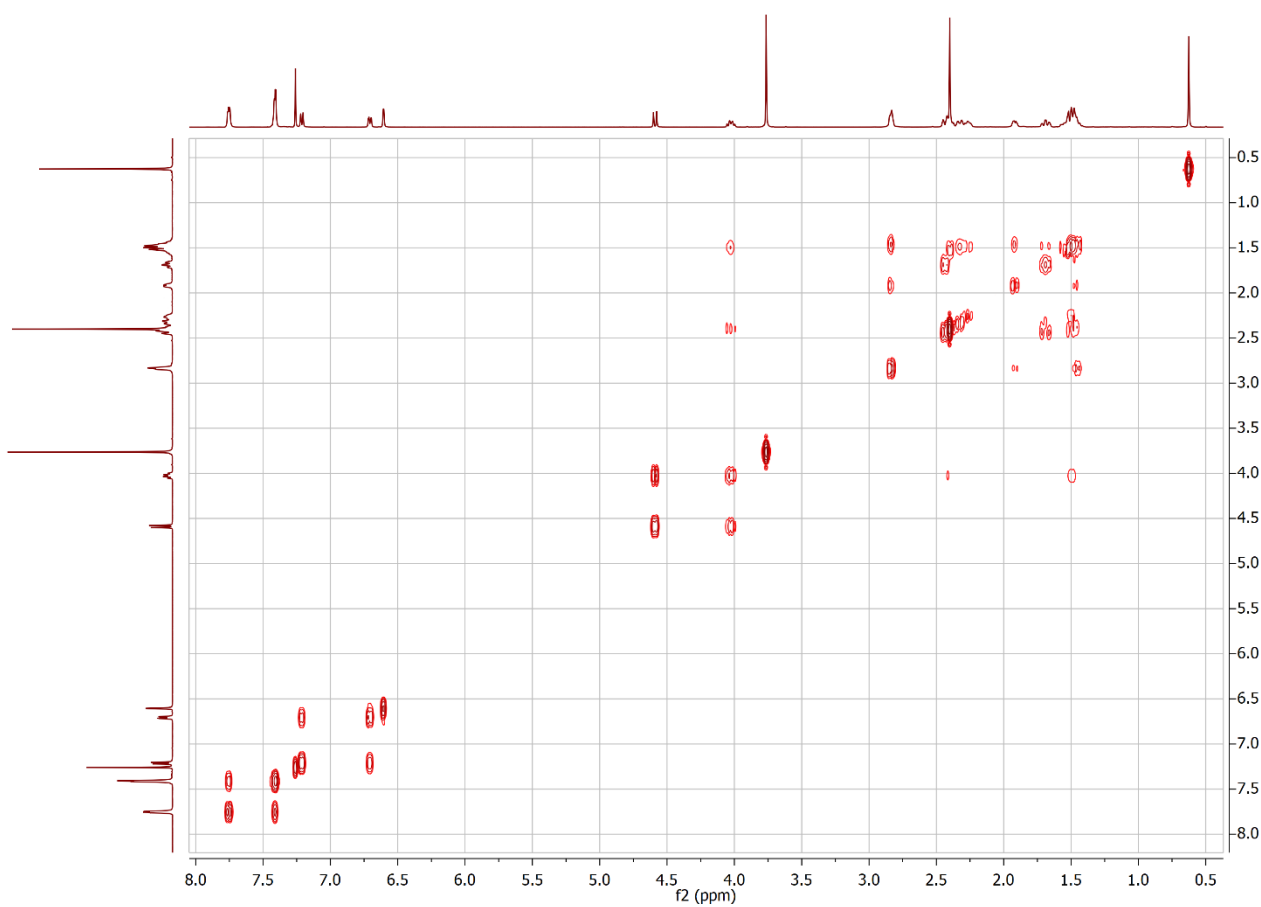

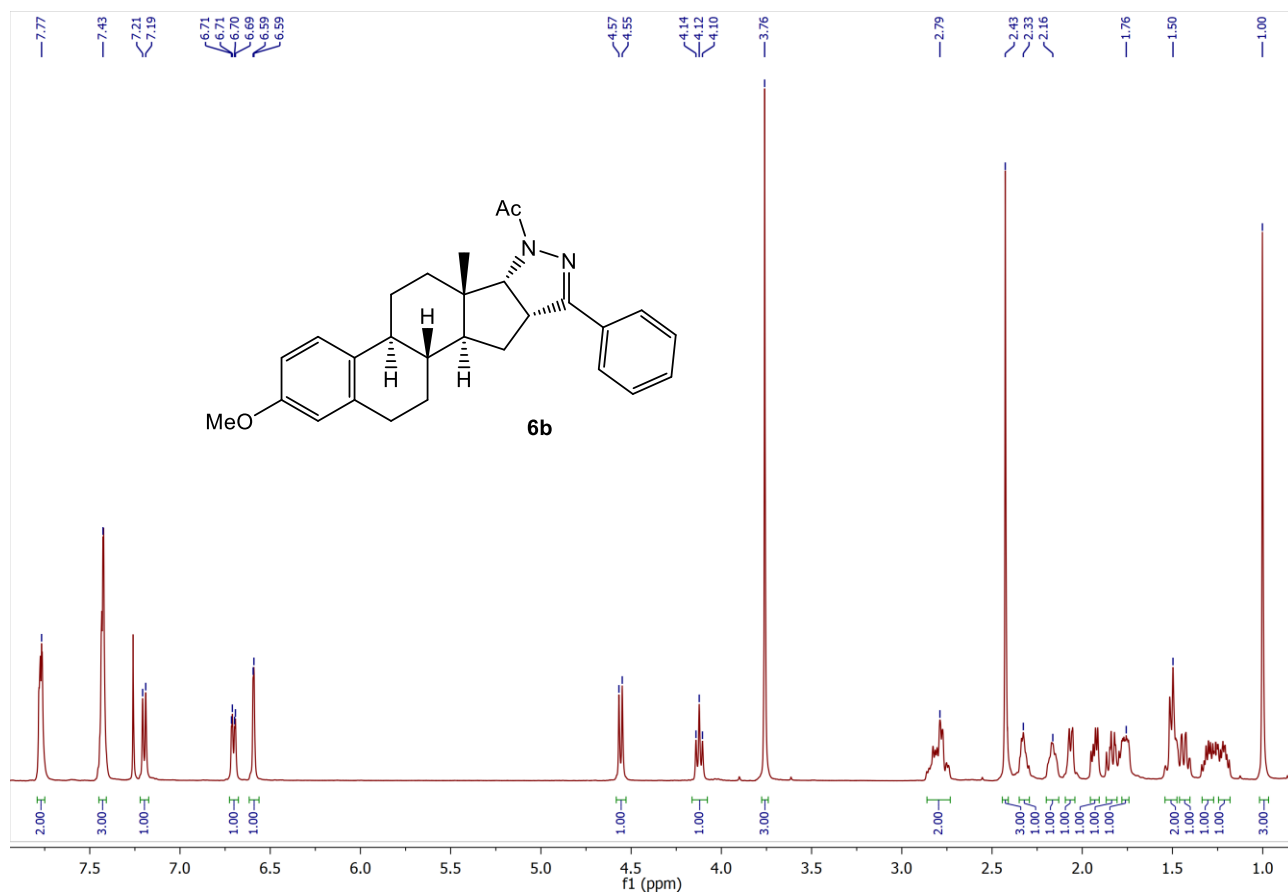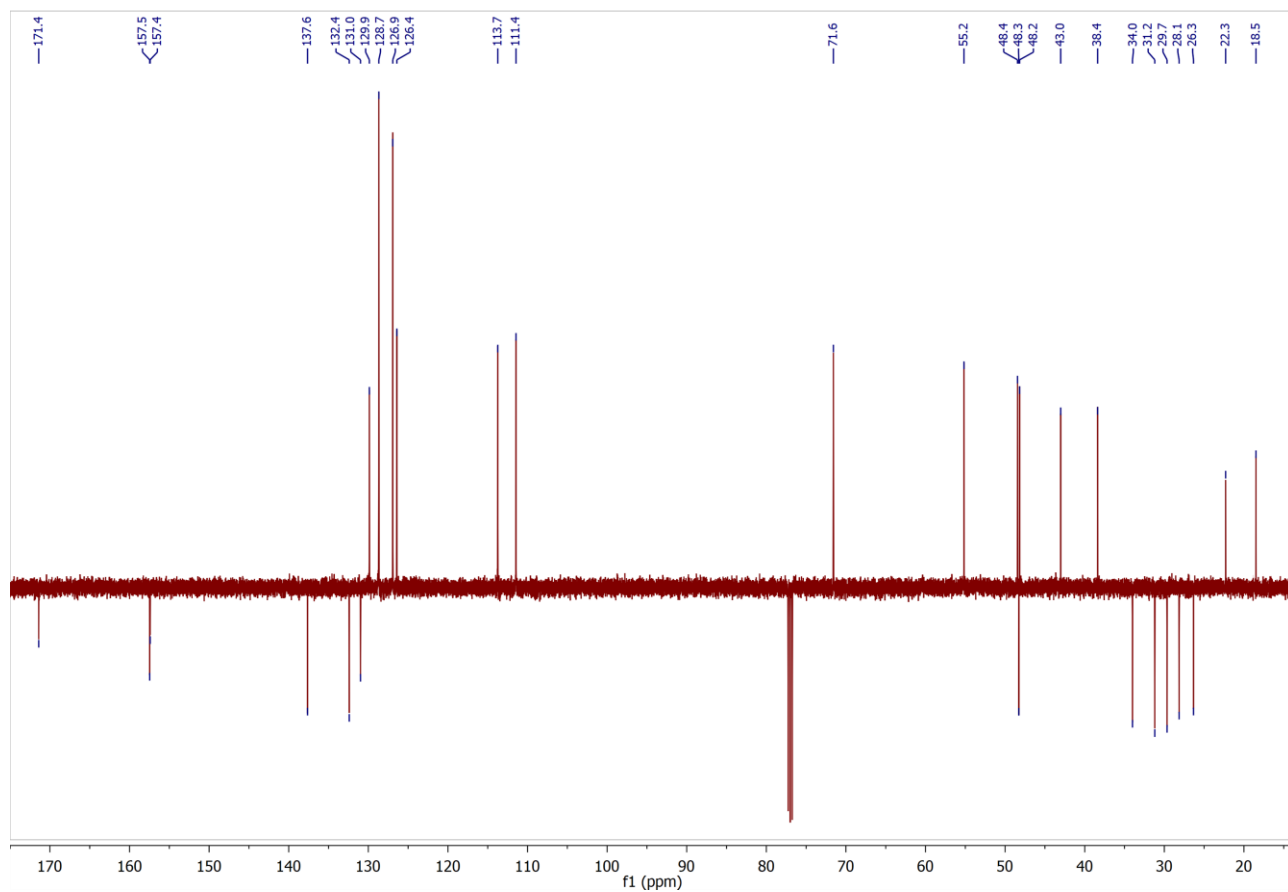

HSQC spectrum of **6b**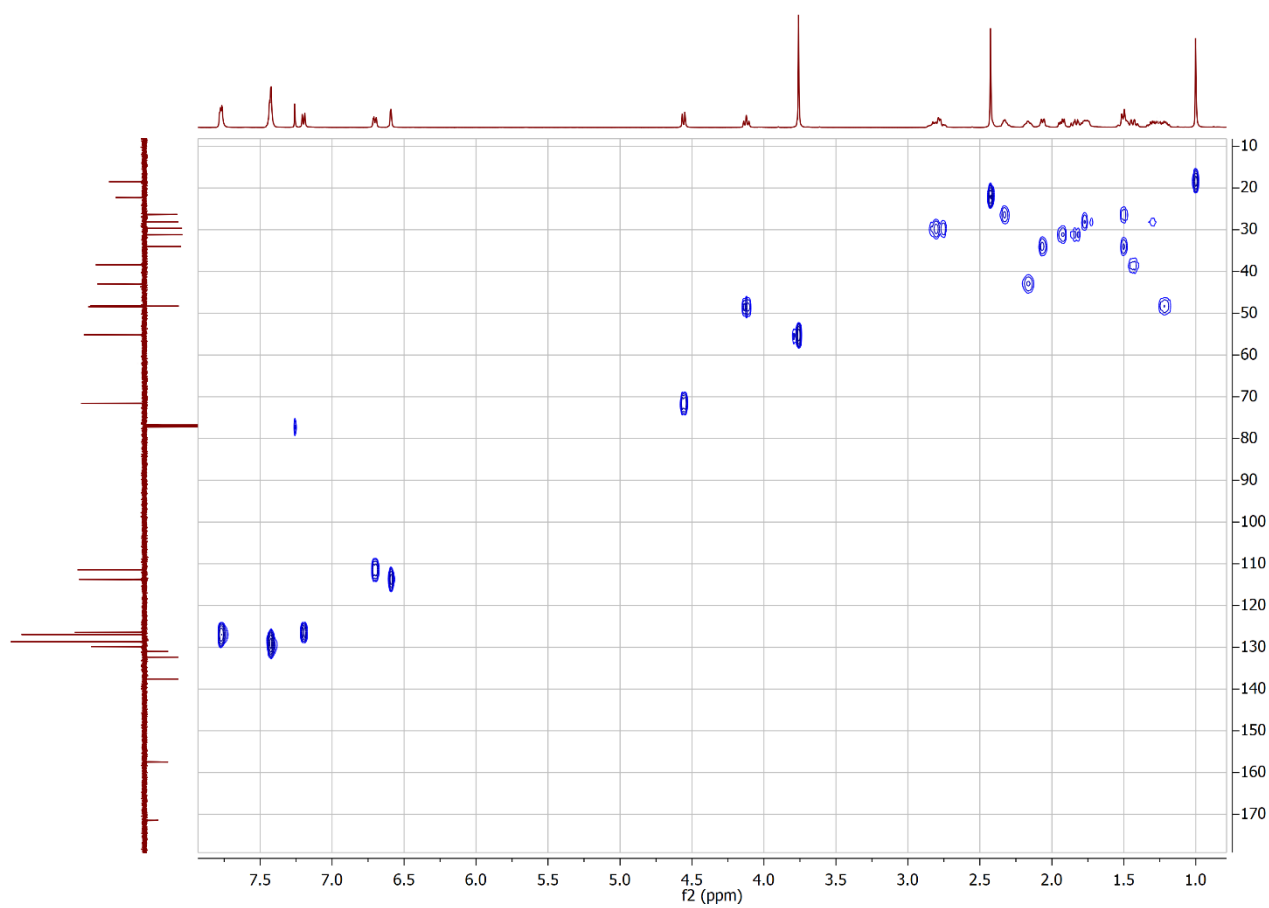HMBC spectrum of **6b**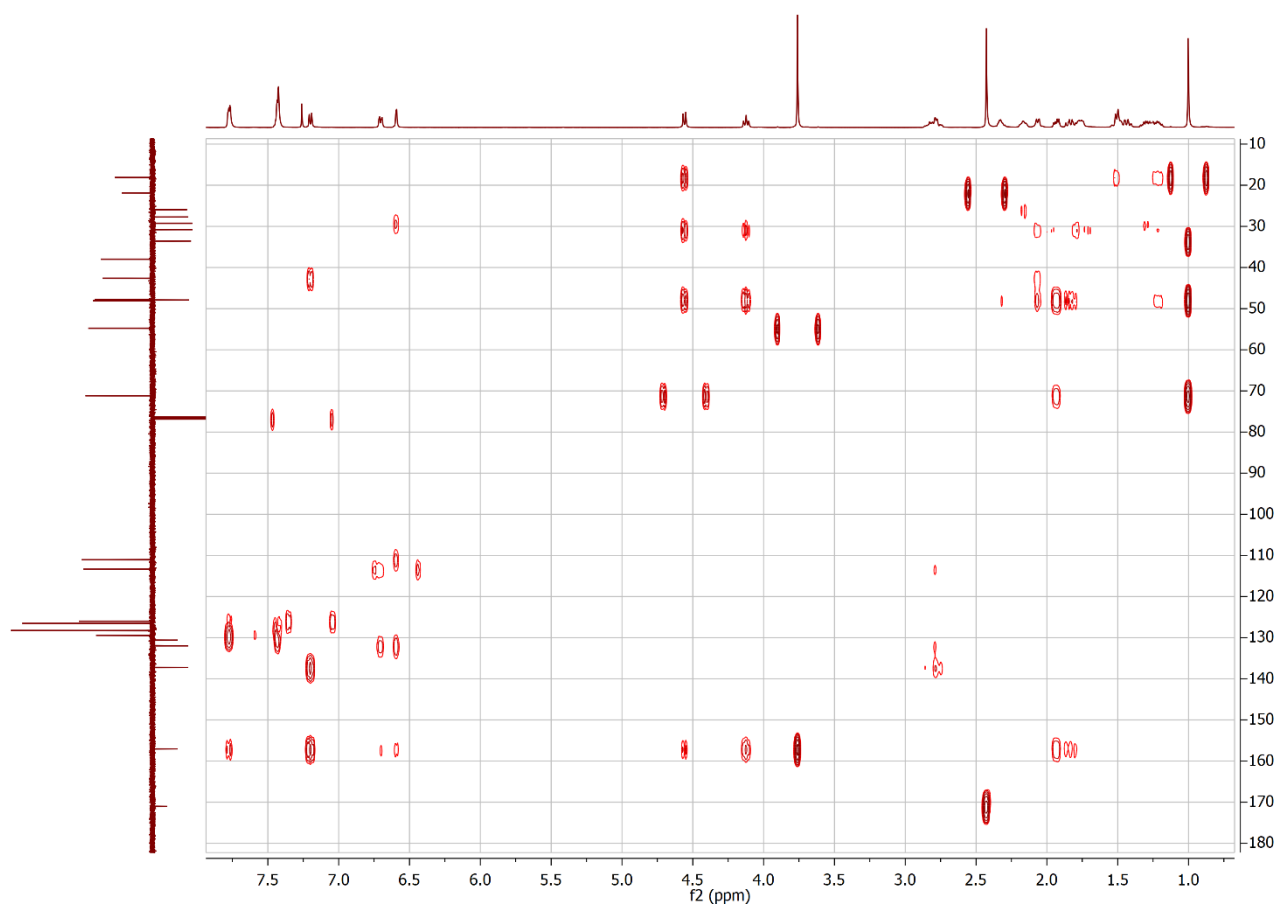

NOESY spectrum of **6b**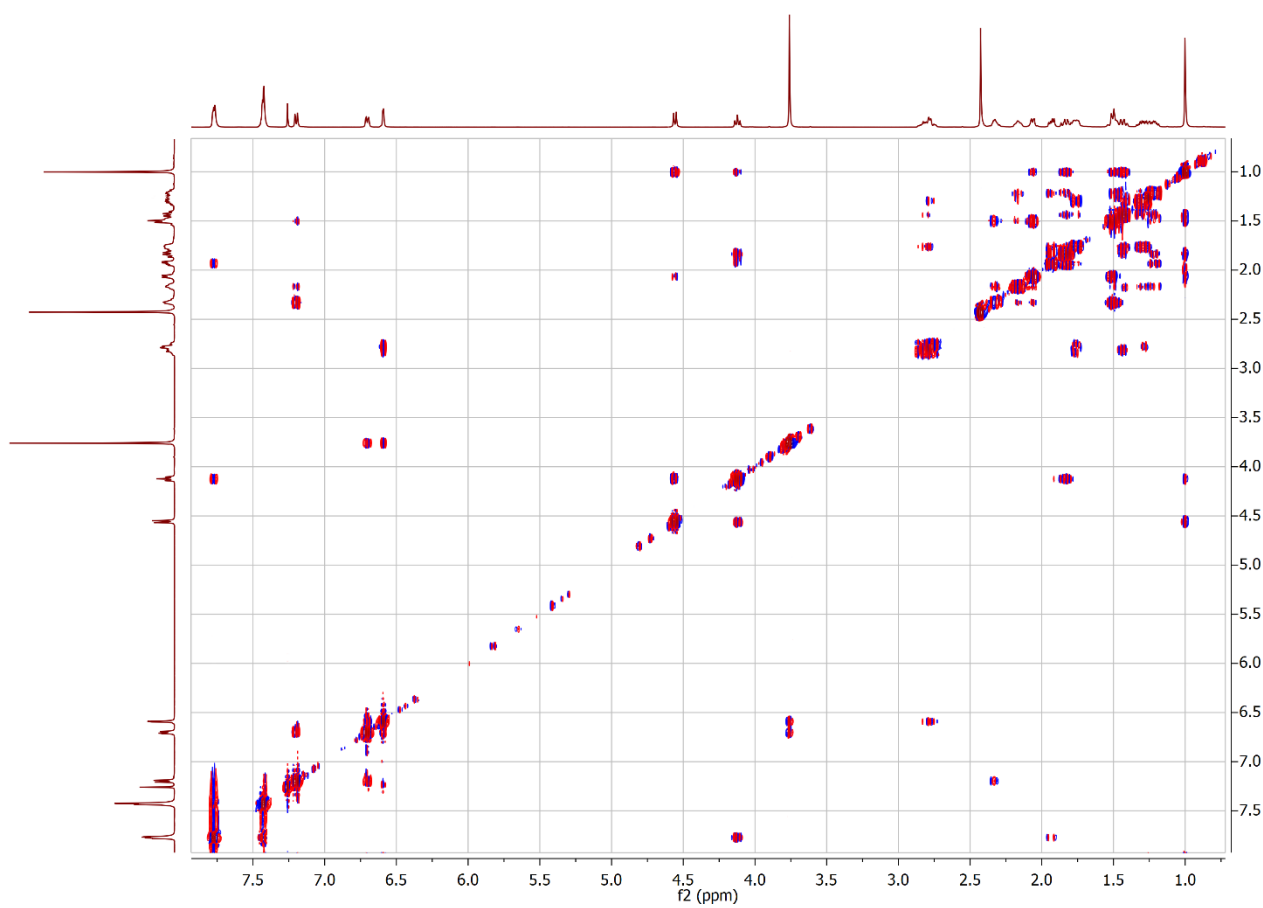COSY spectrum of **6b**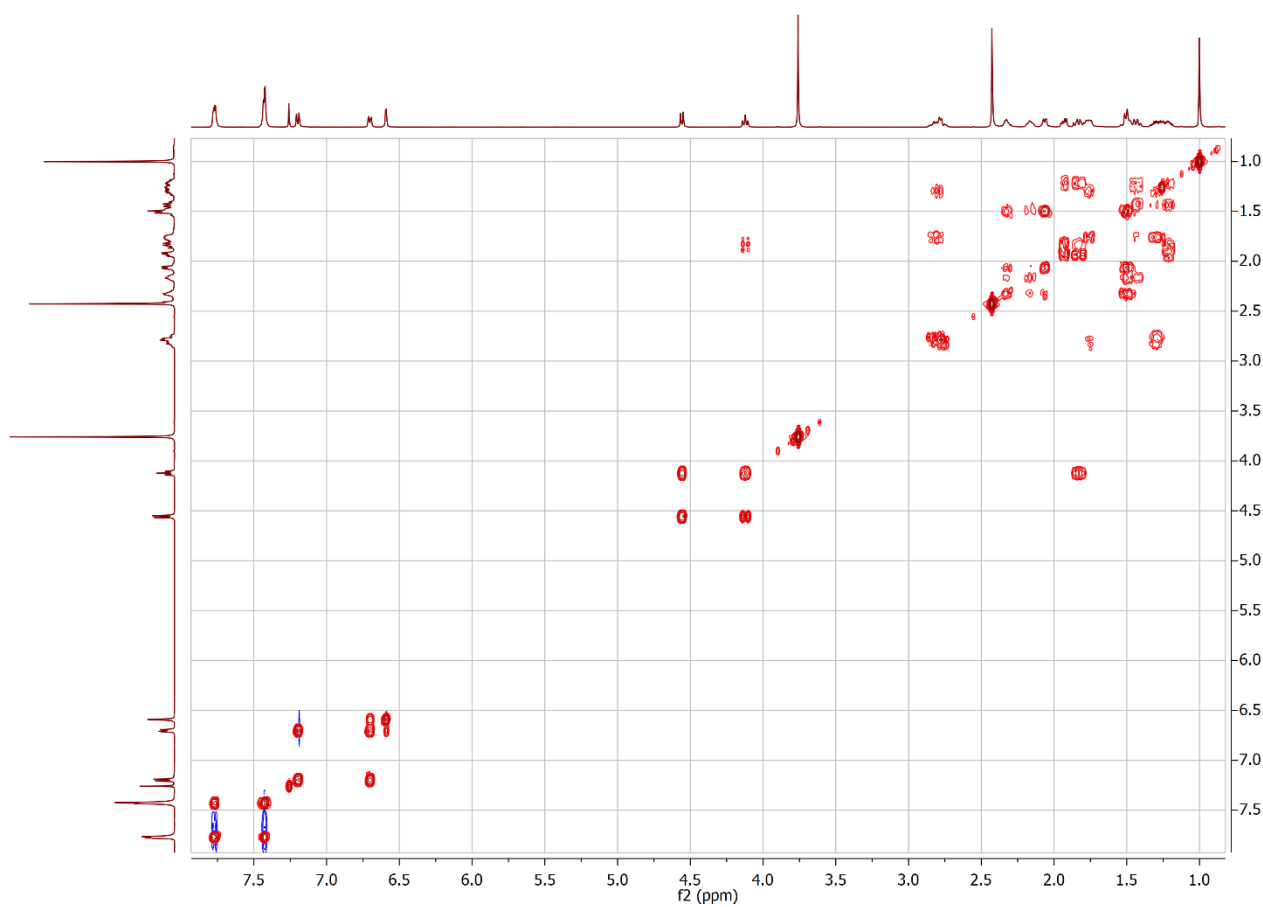



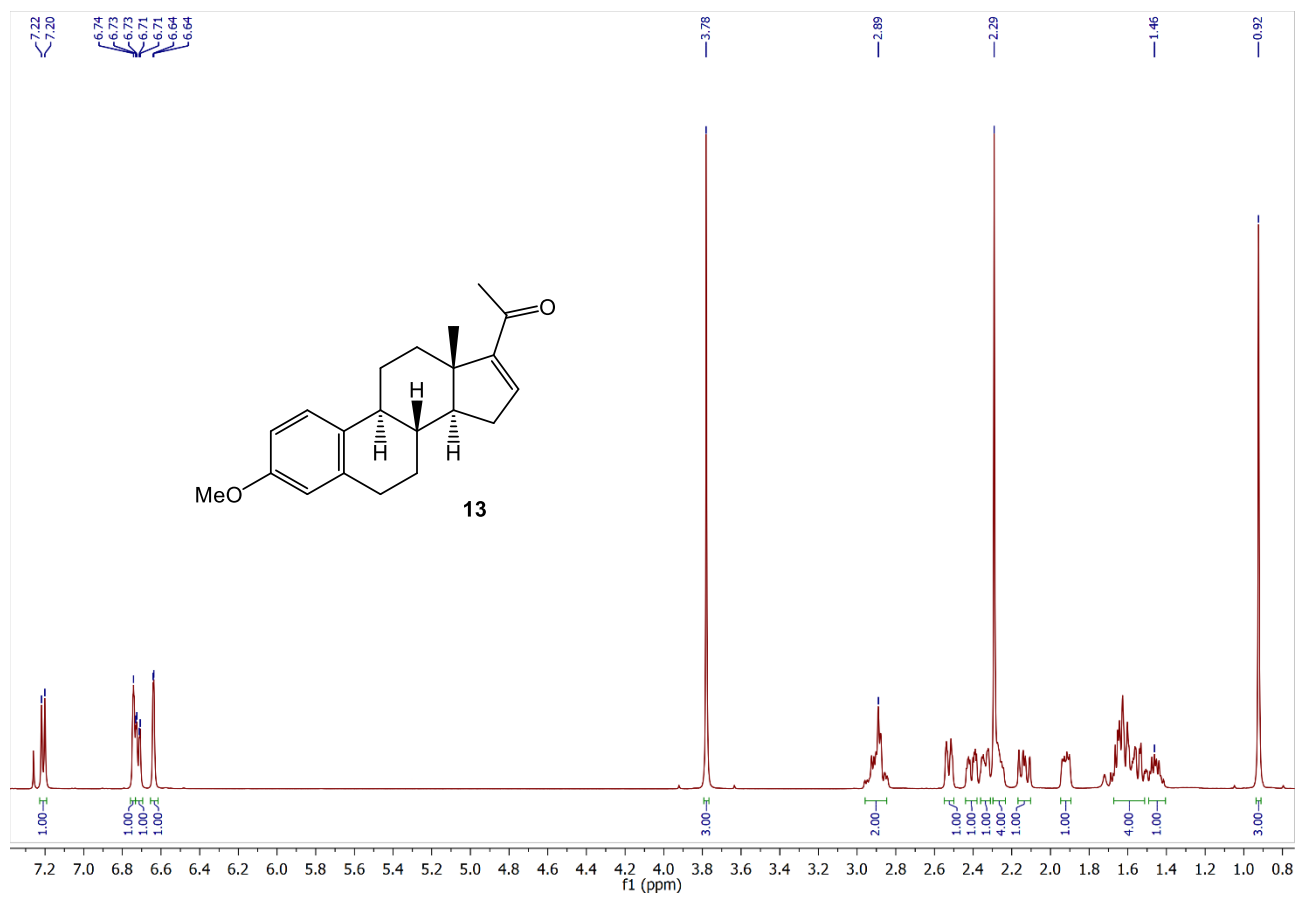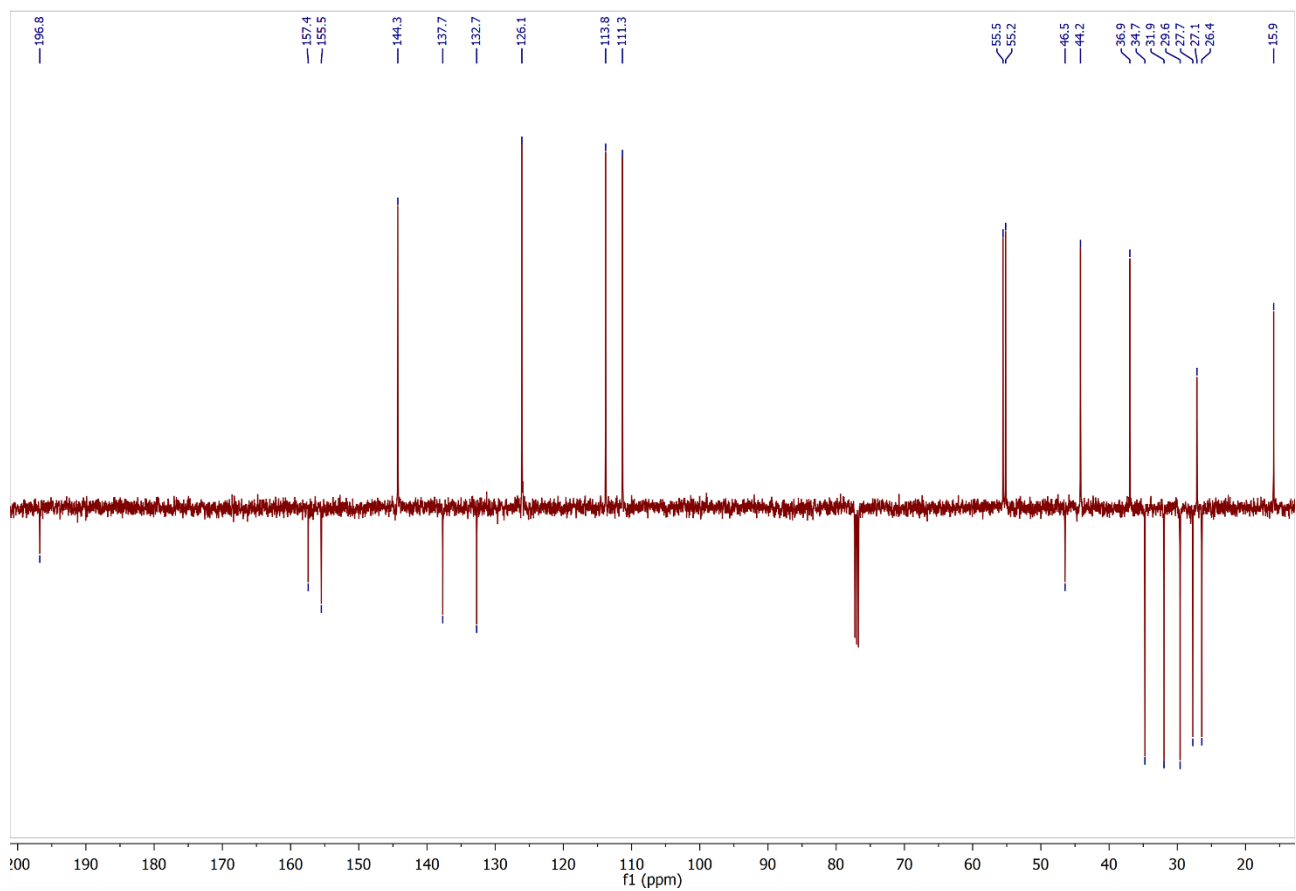

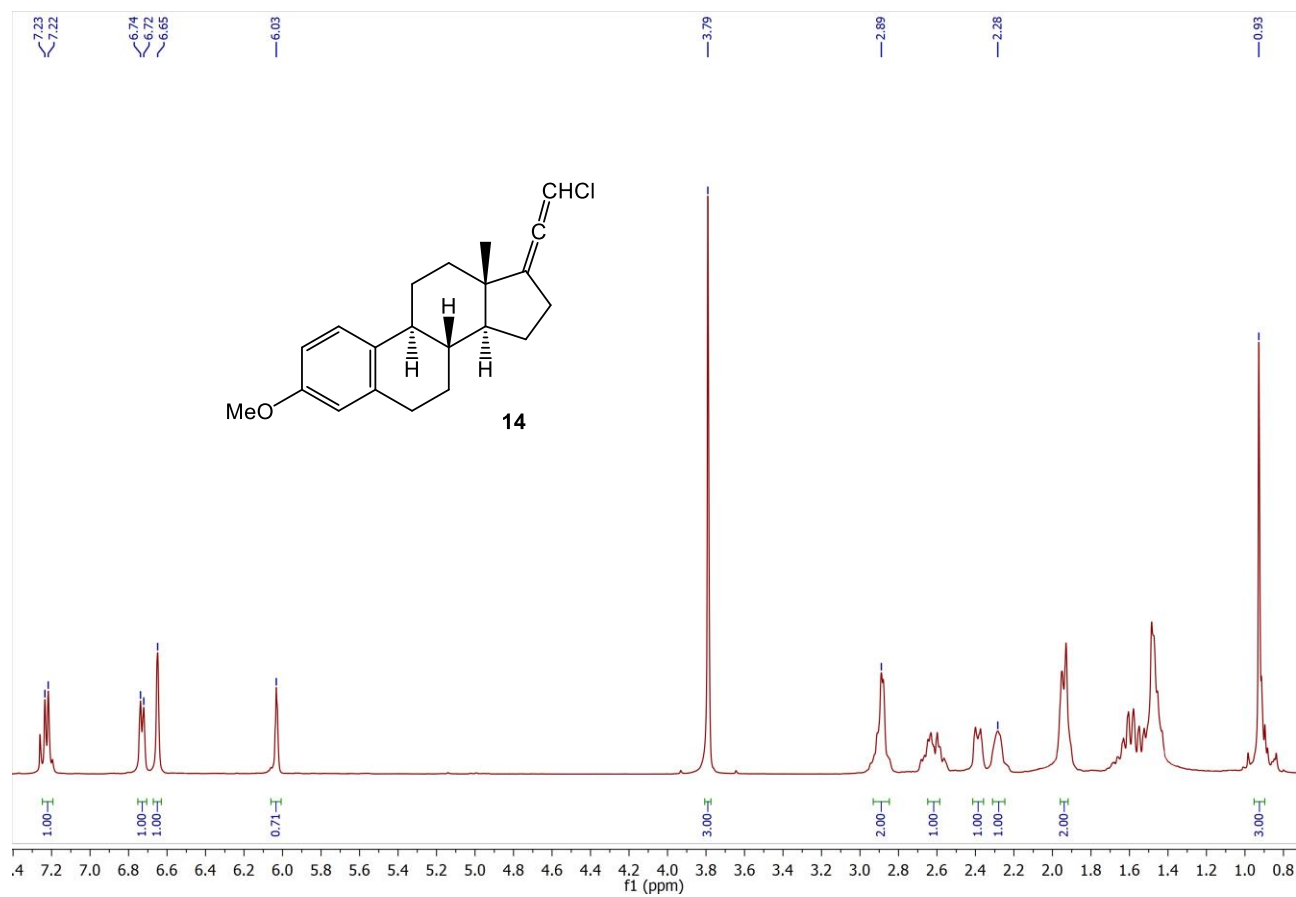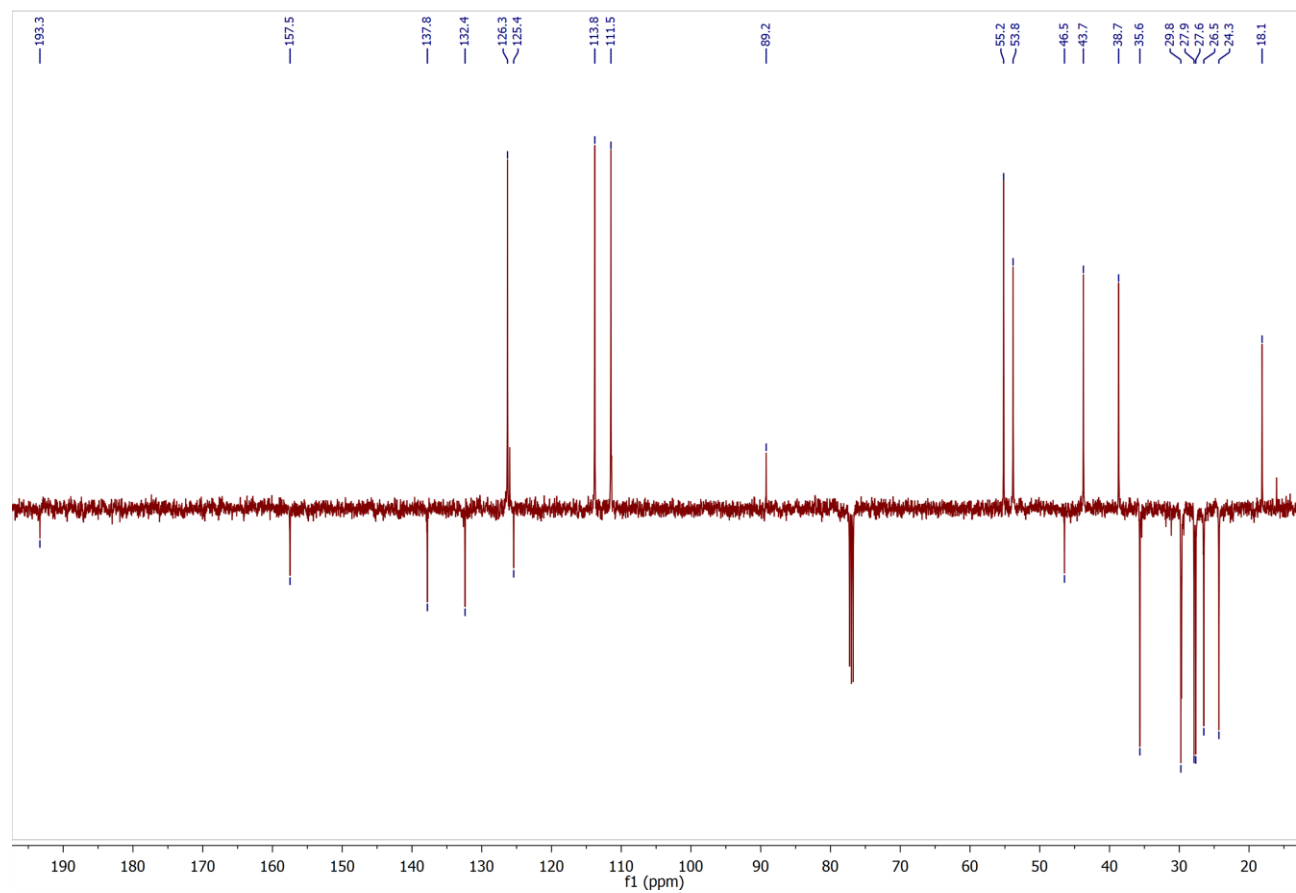

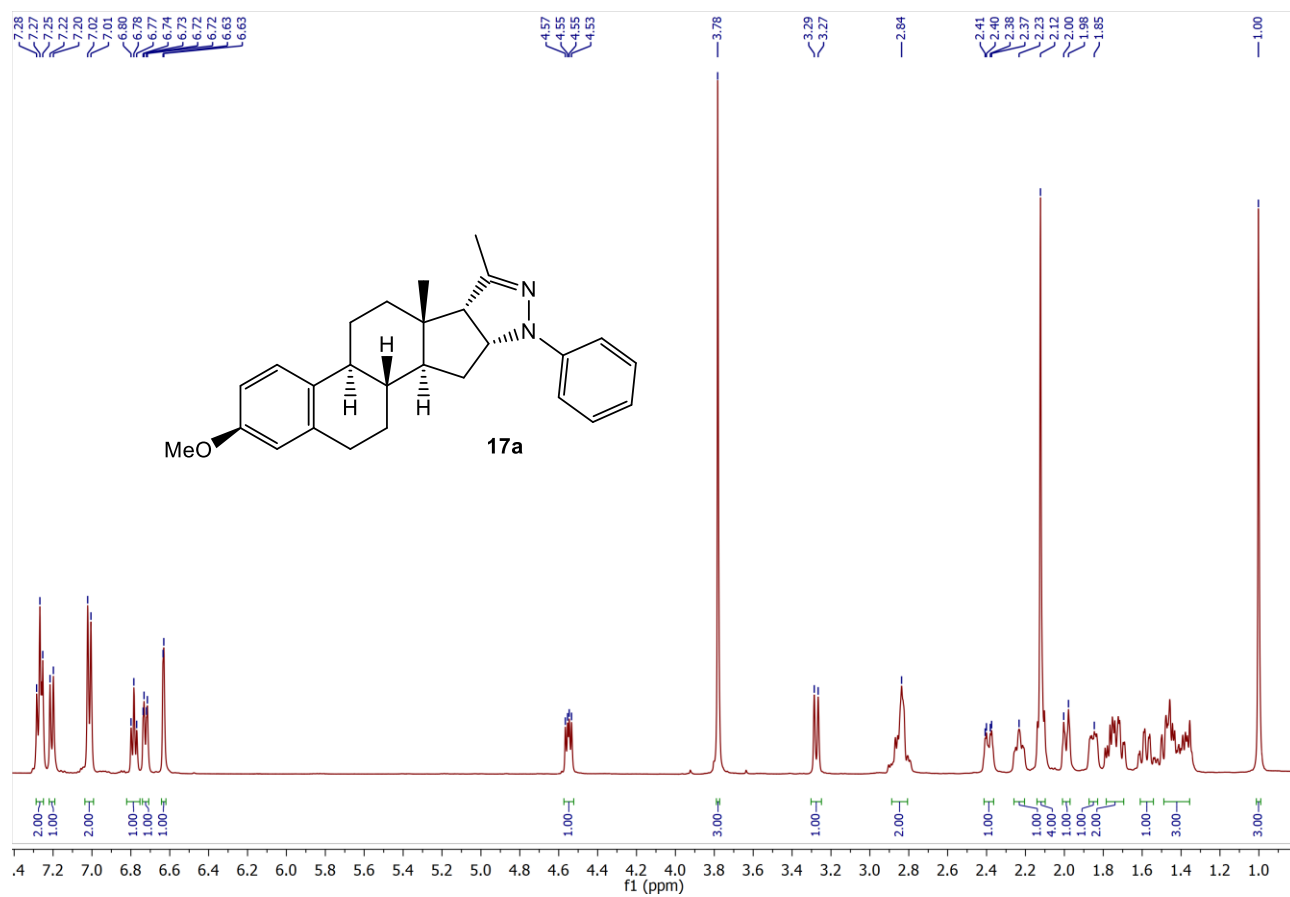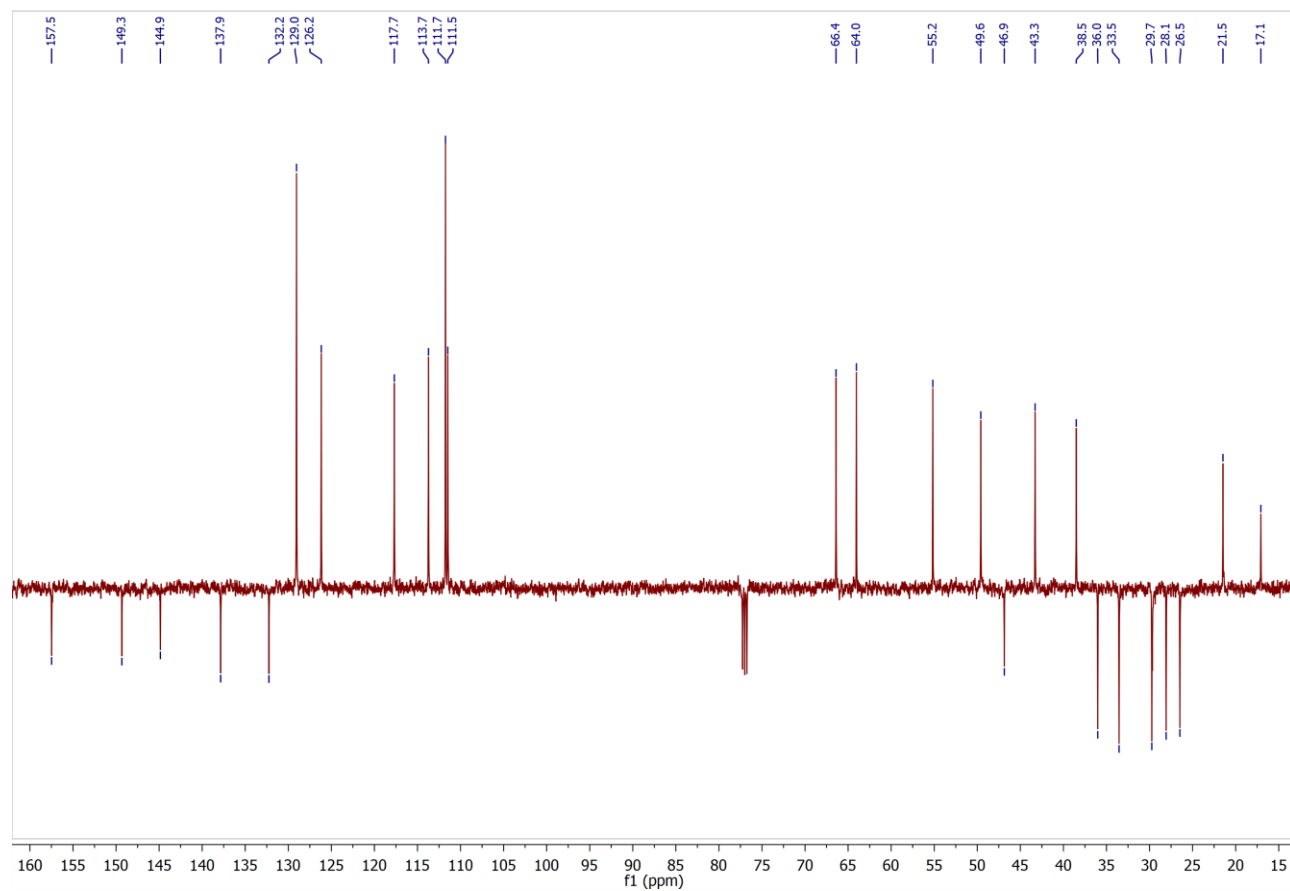

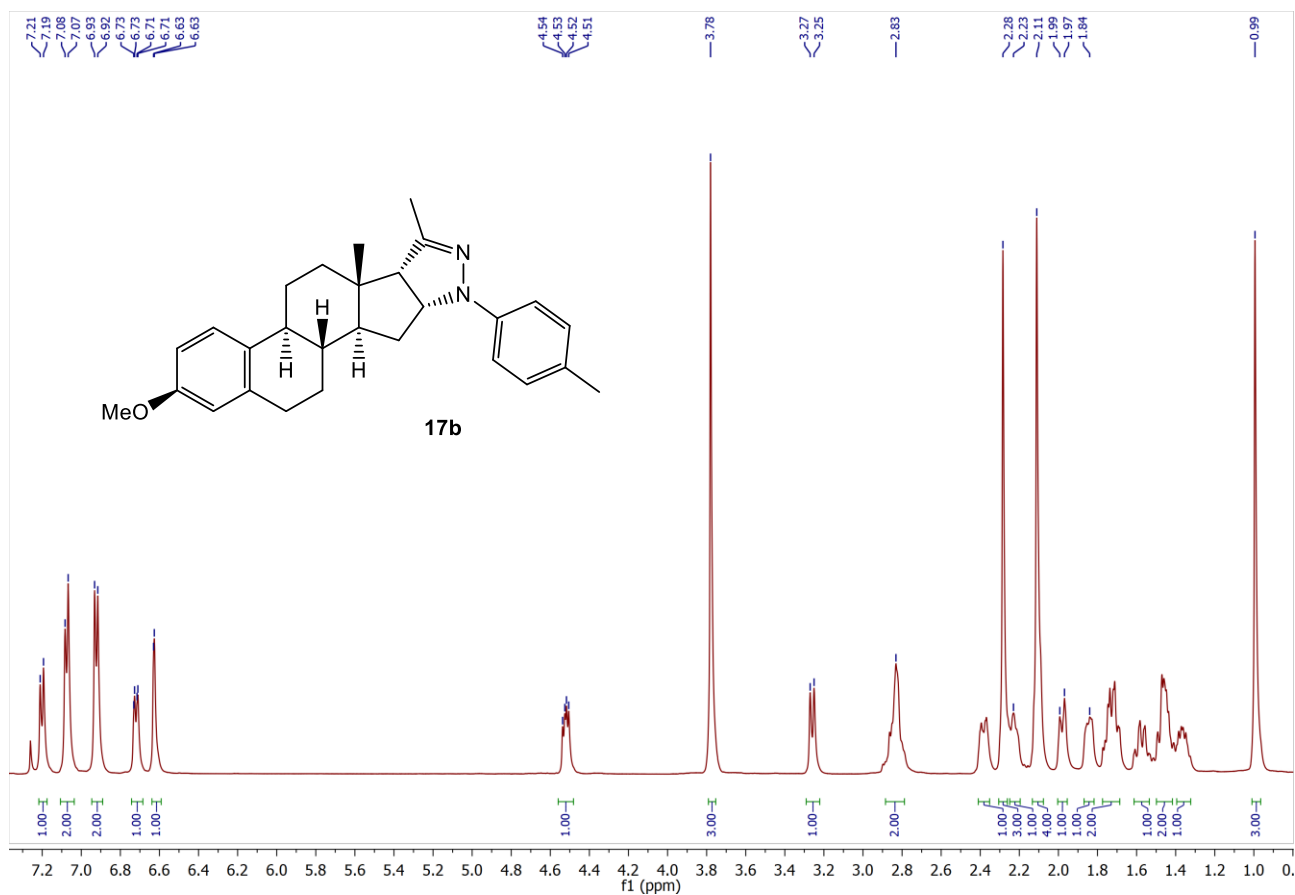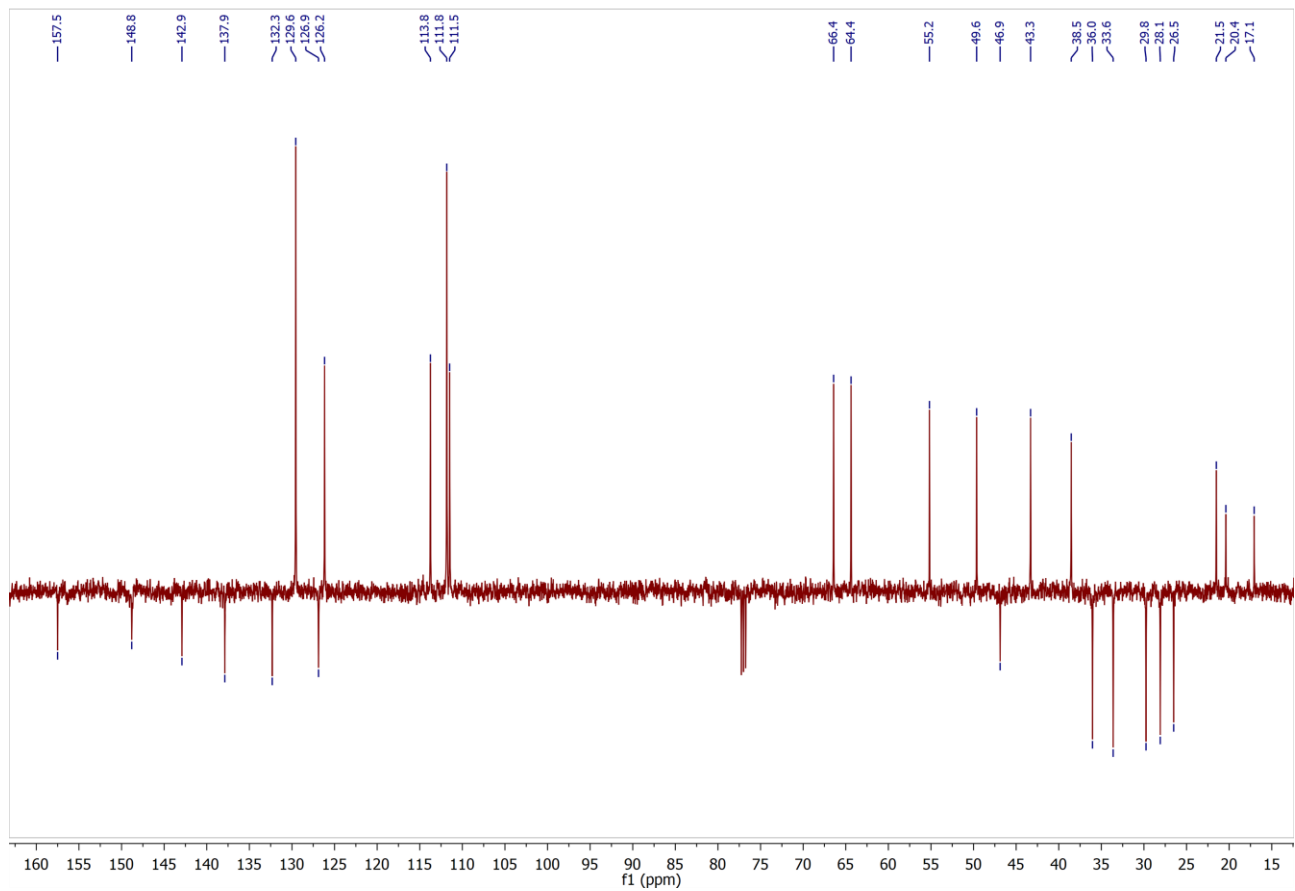

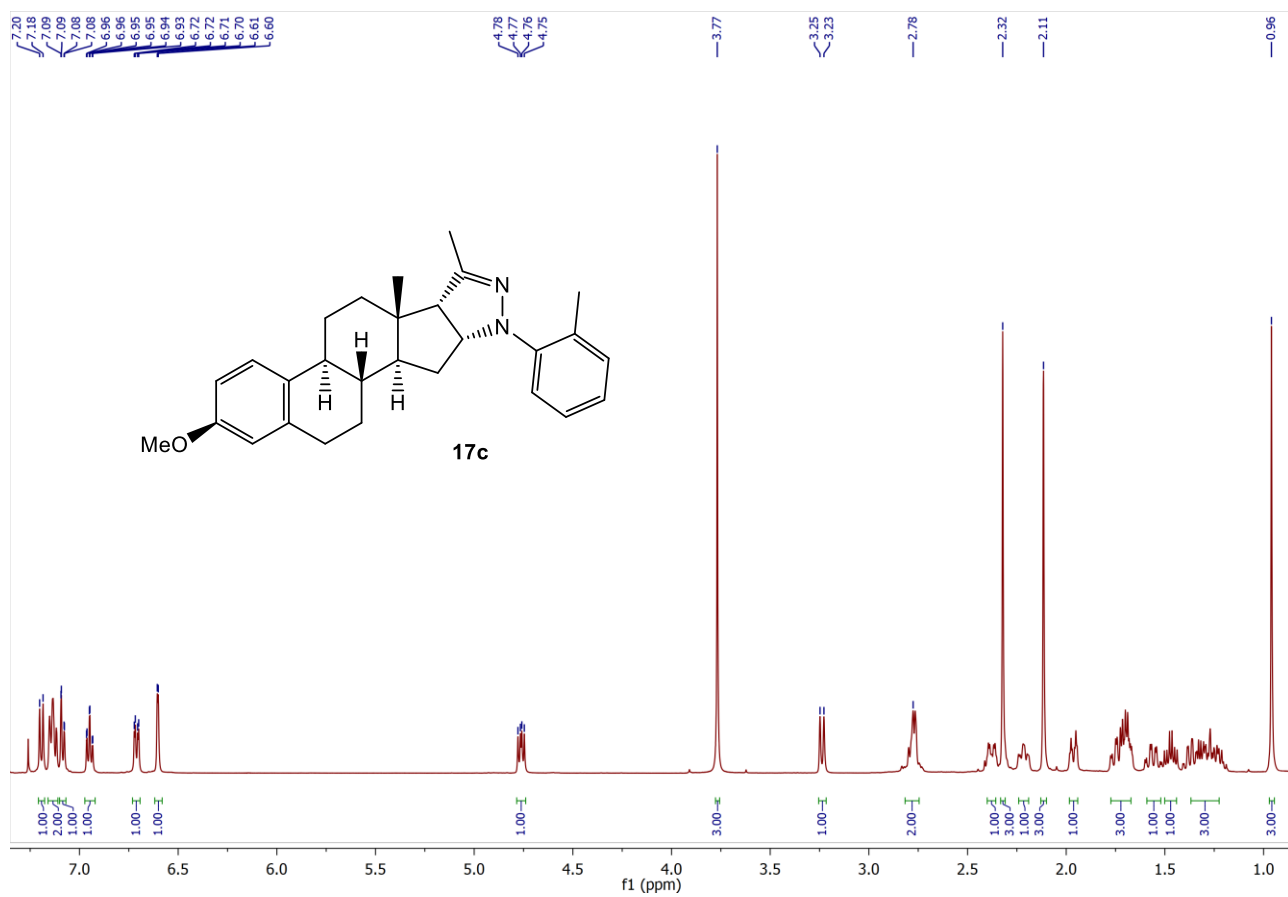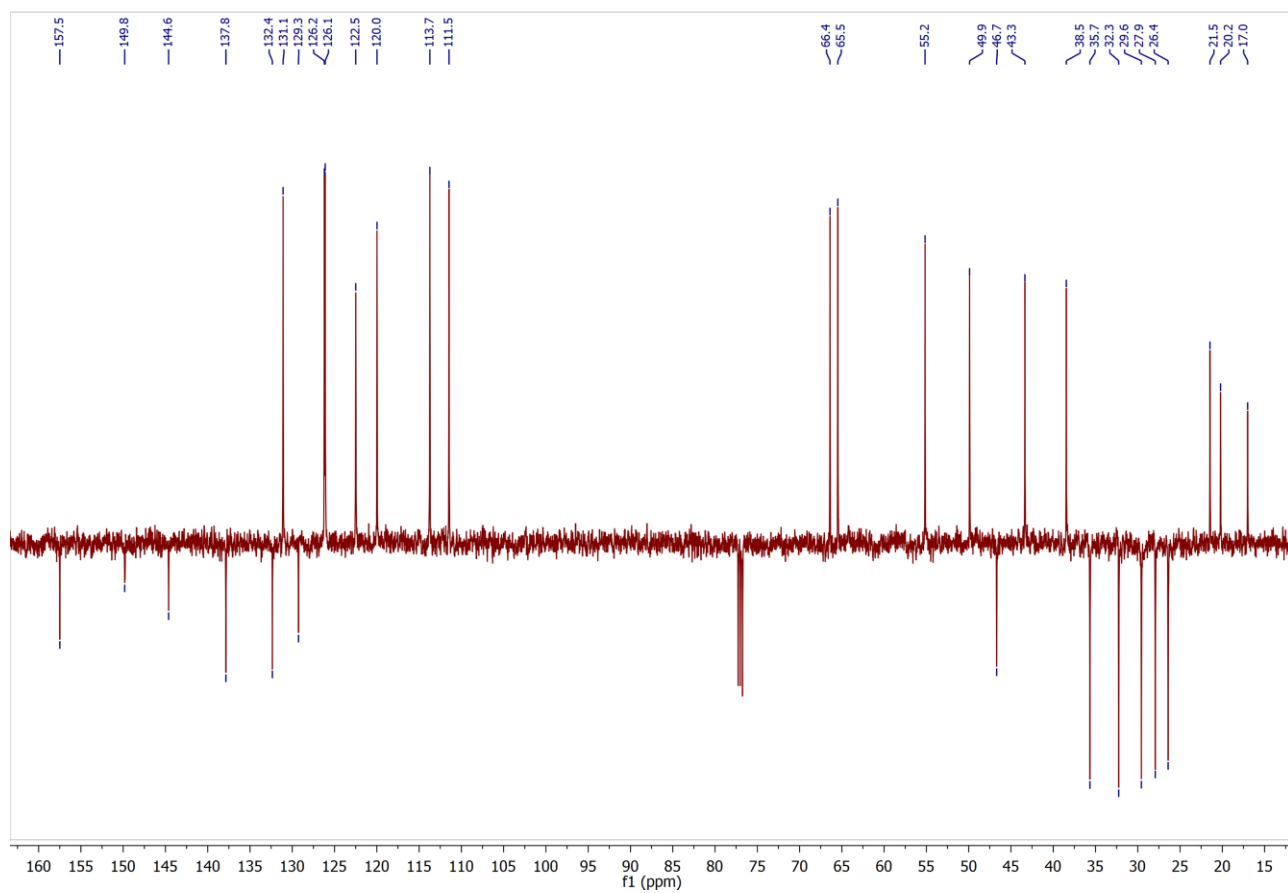

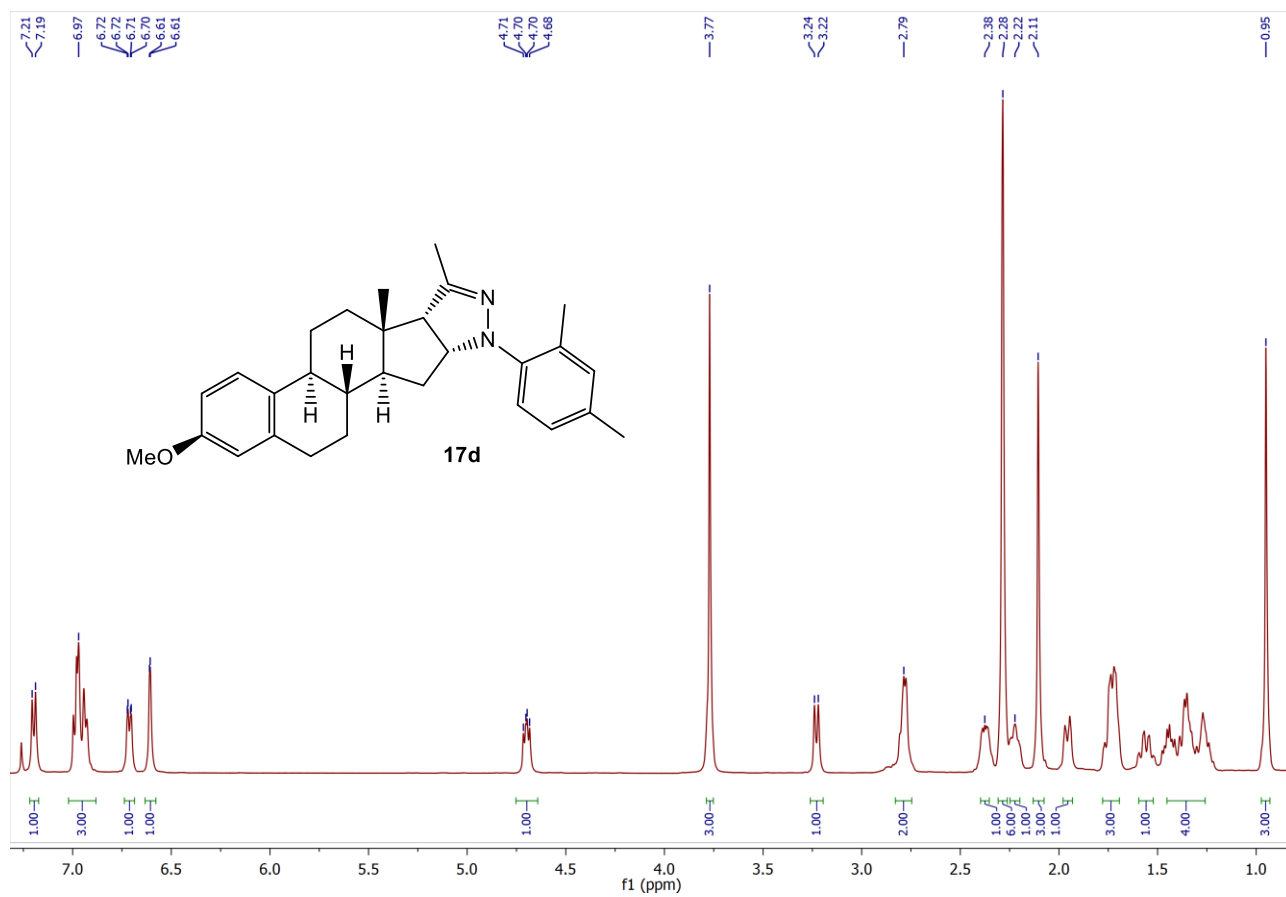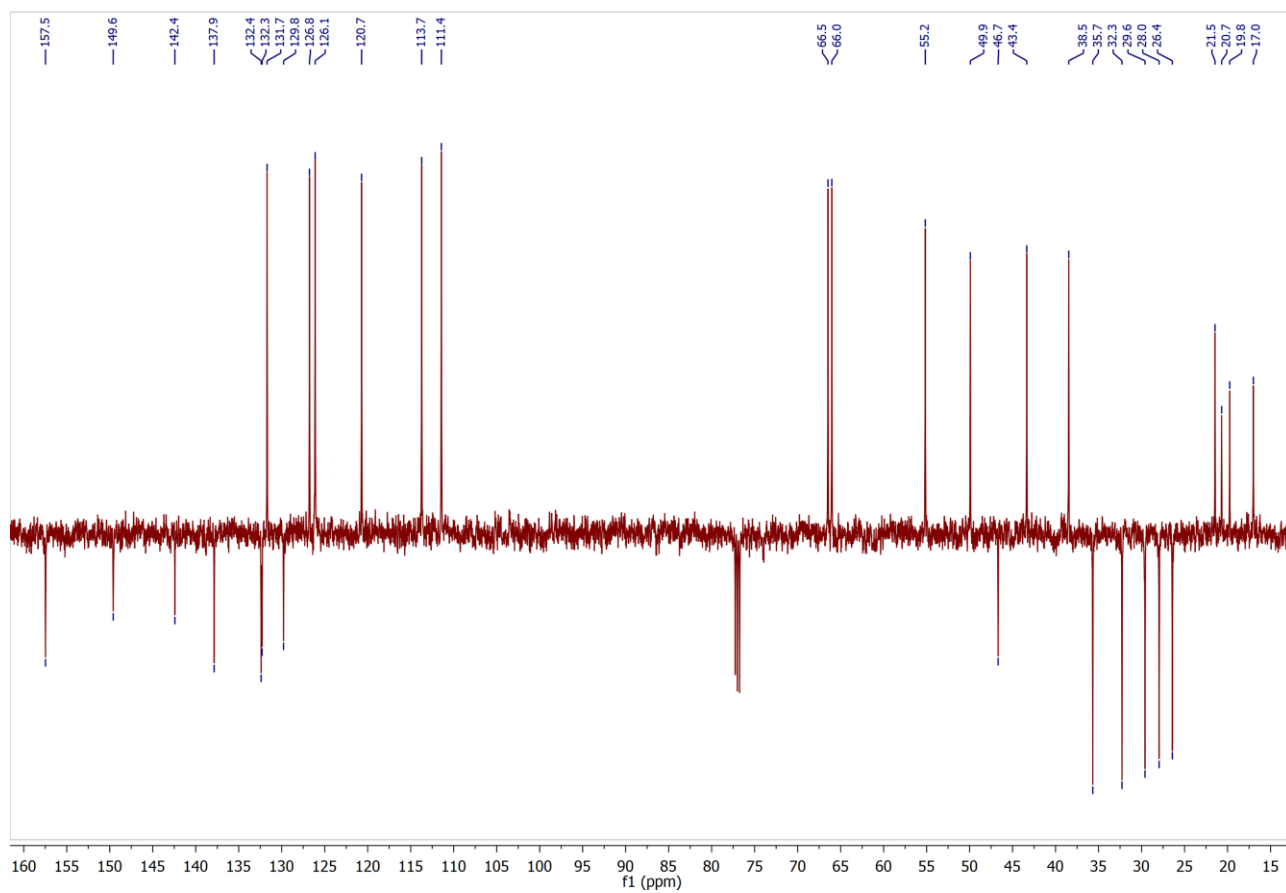

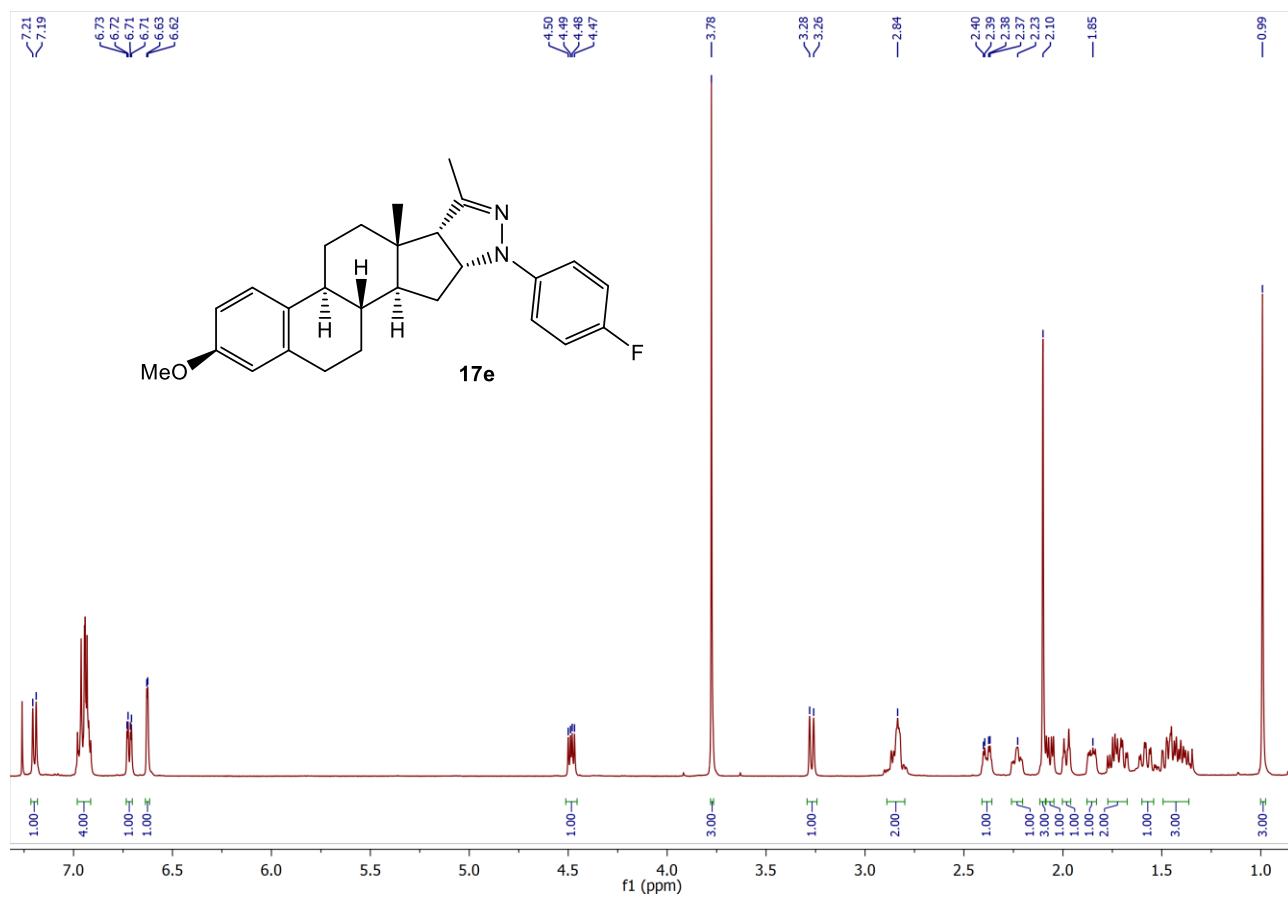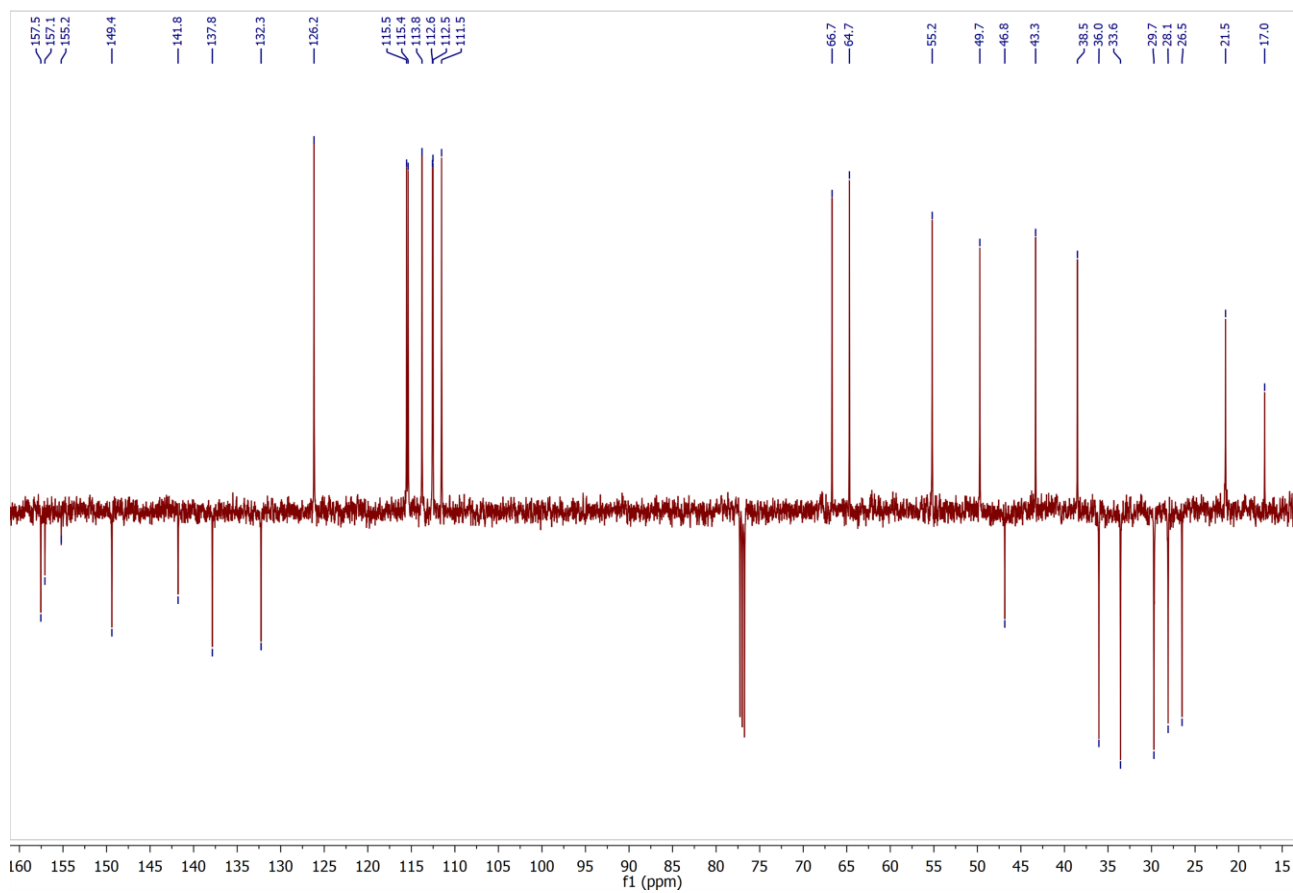

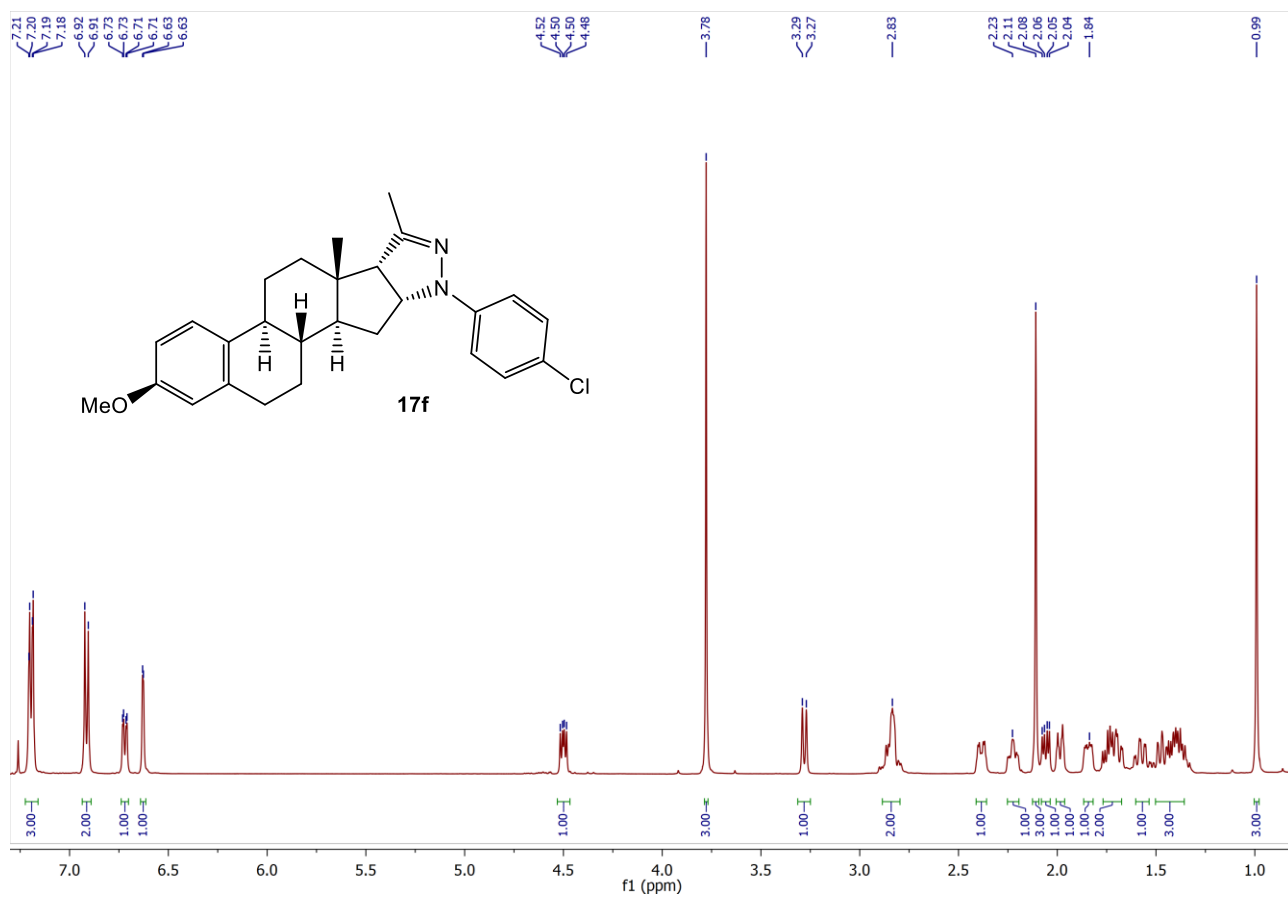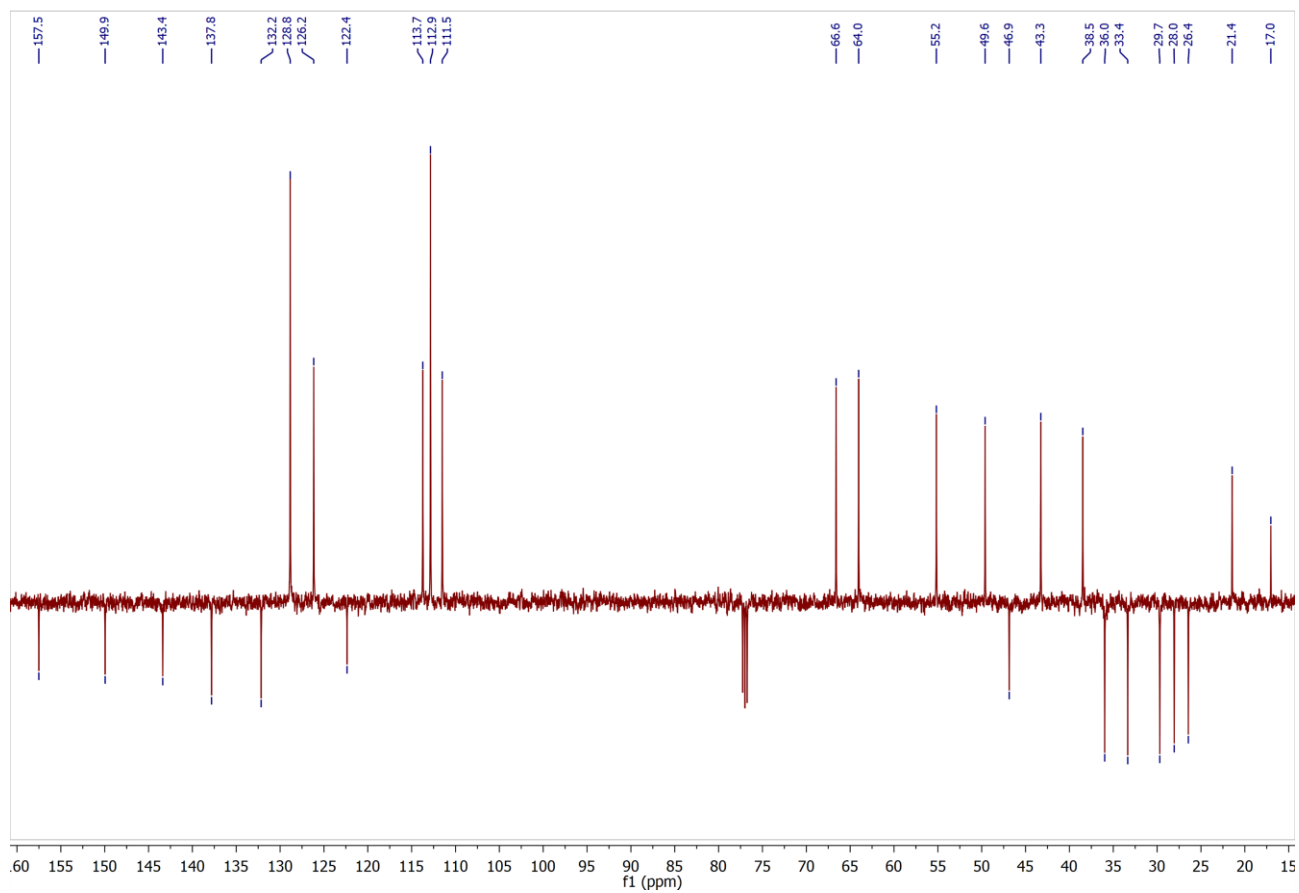



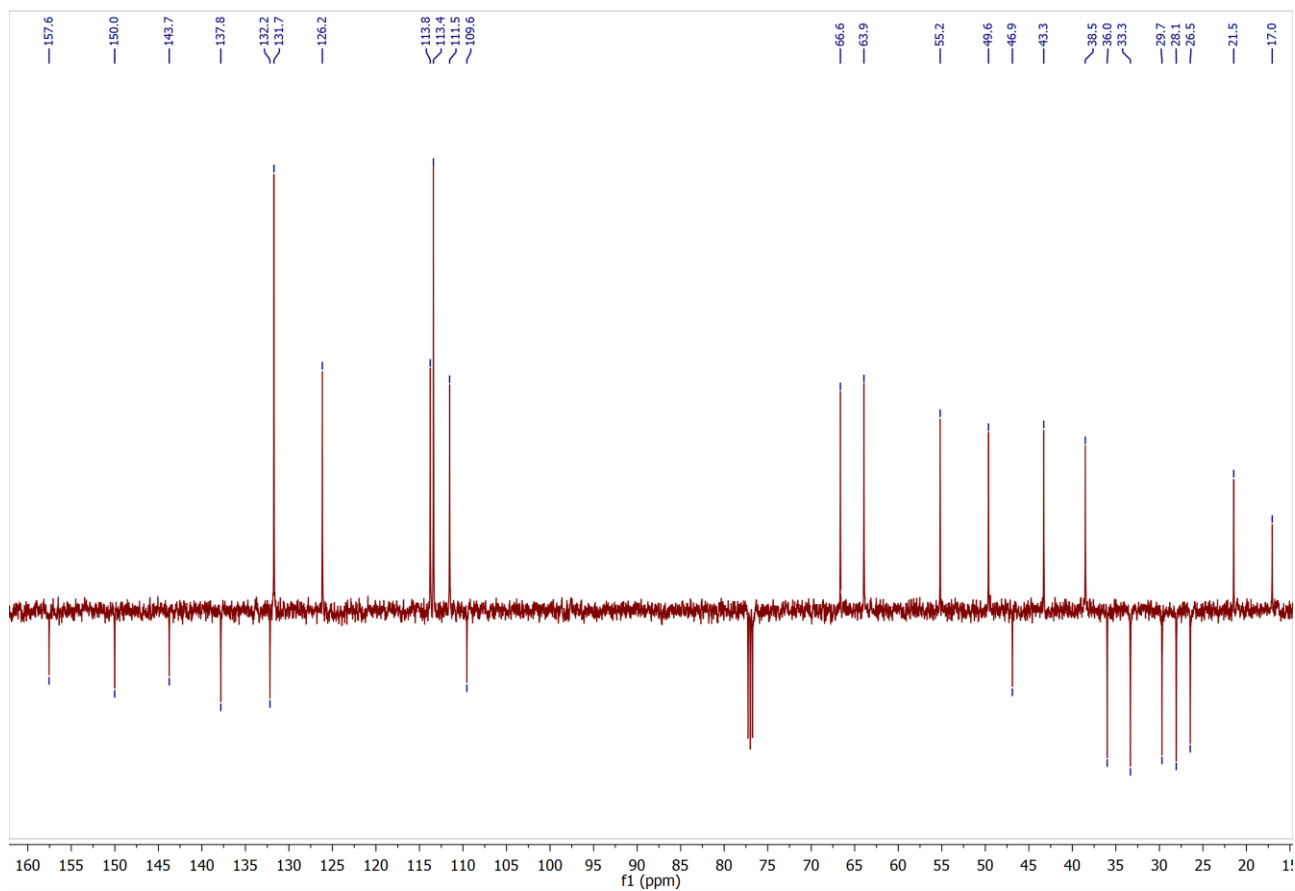

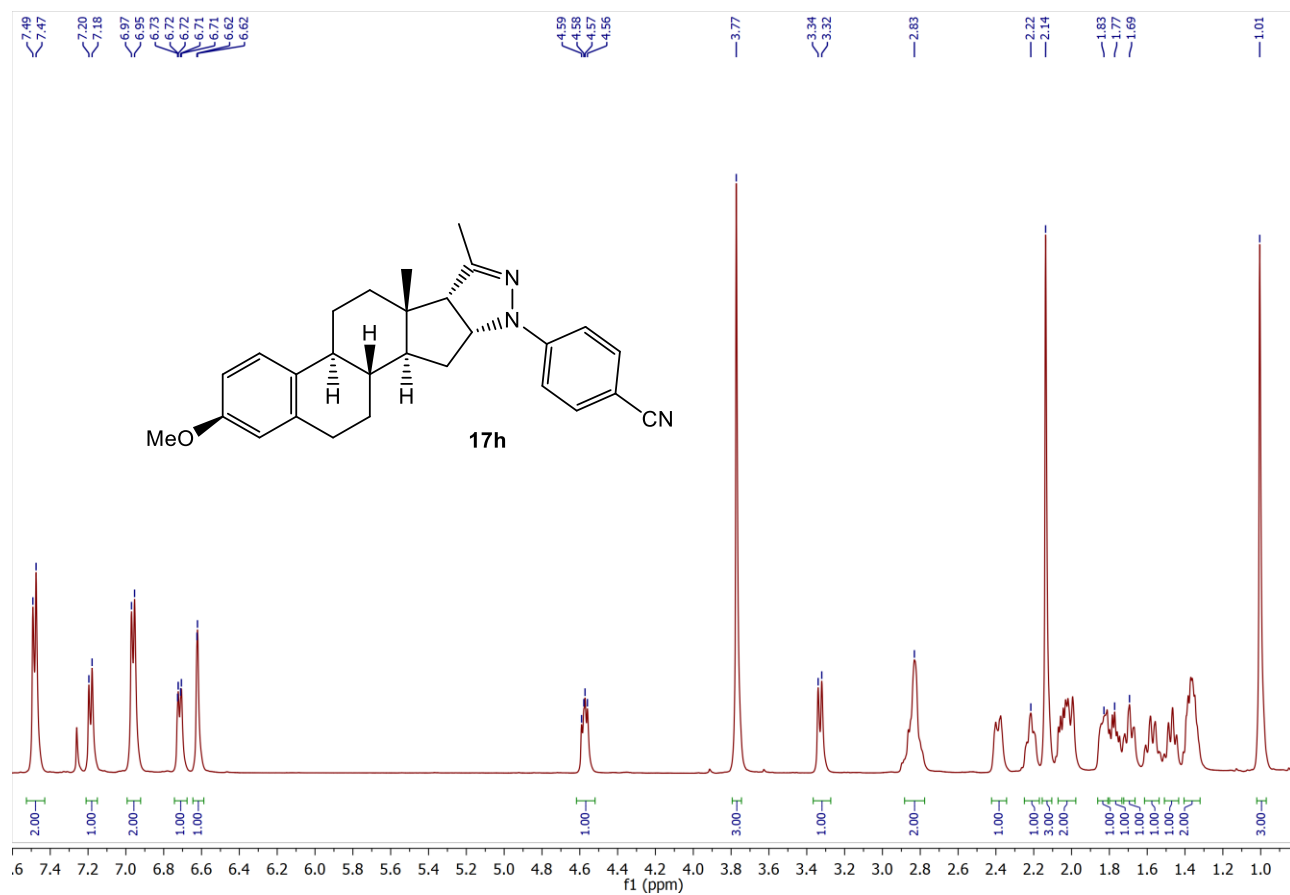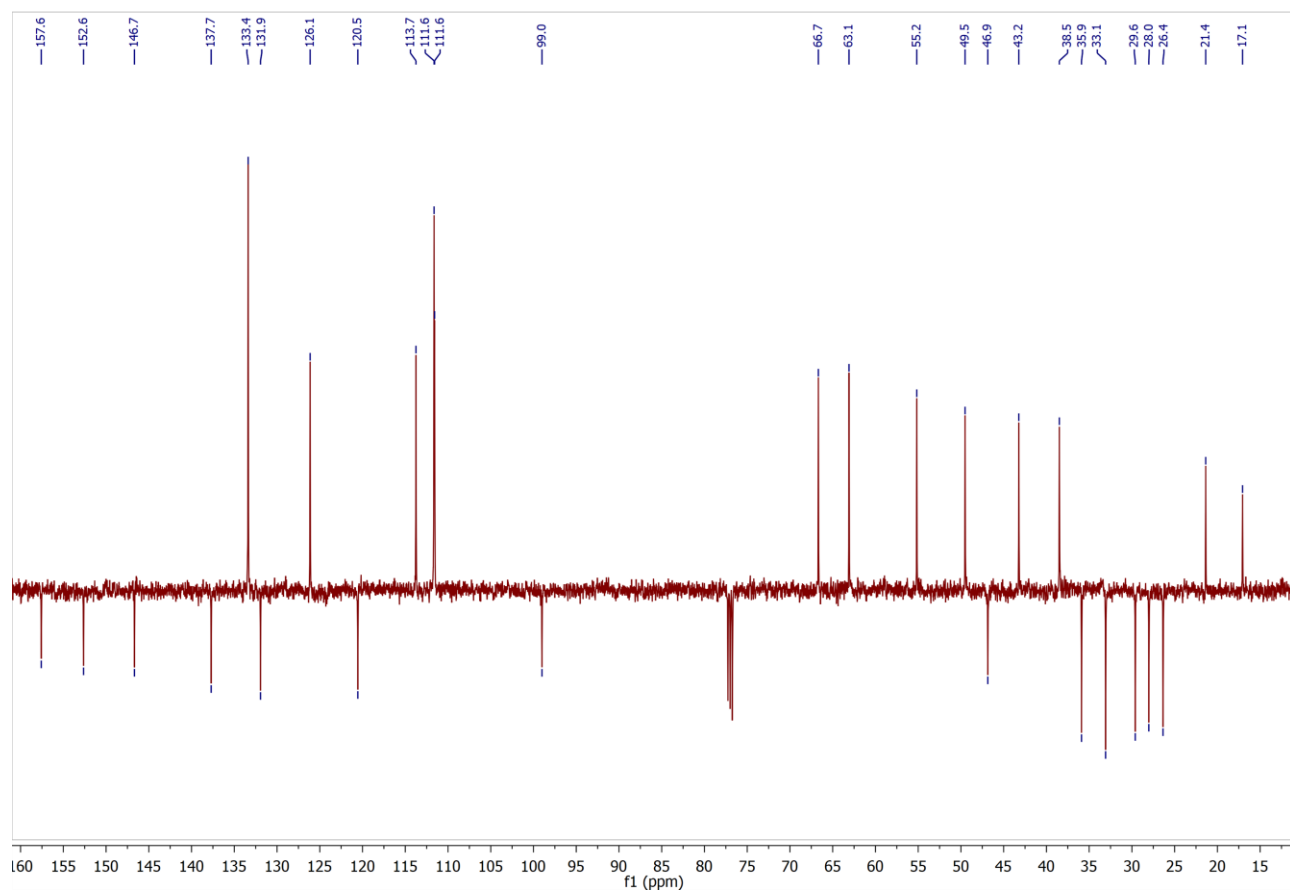

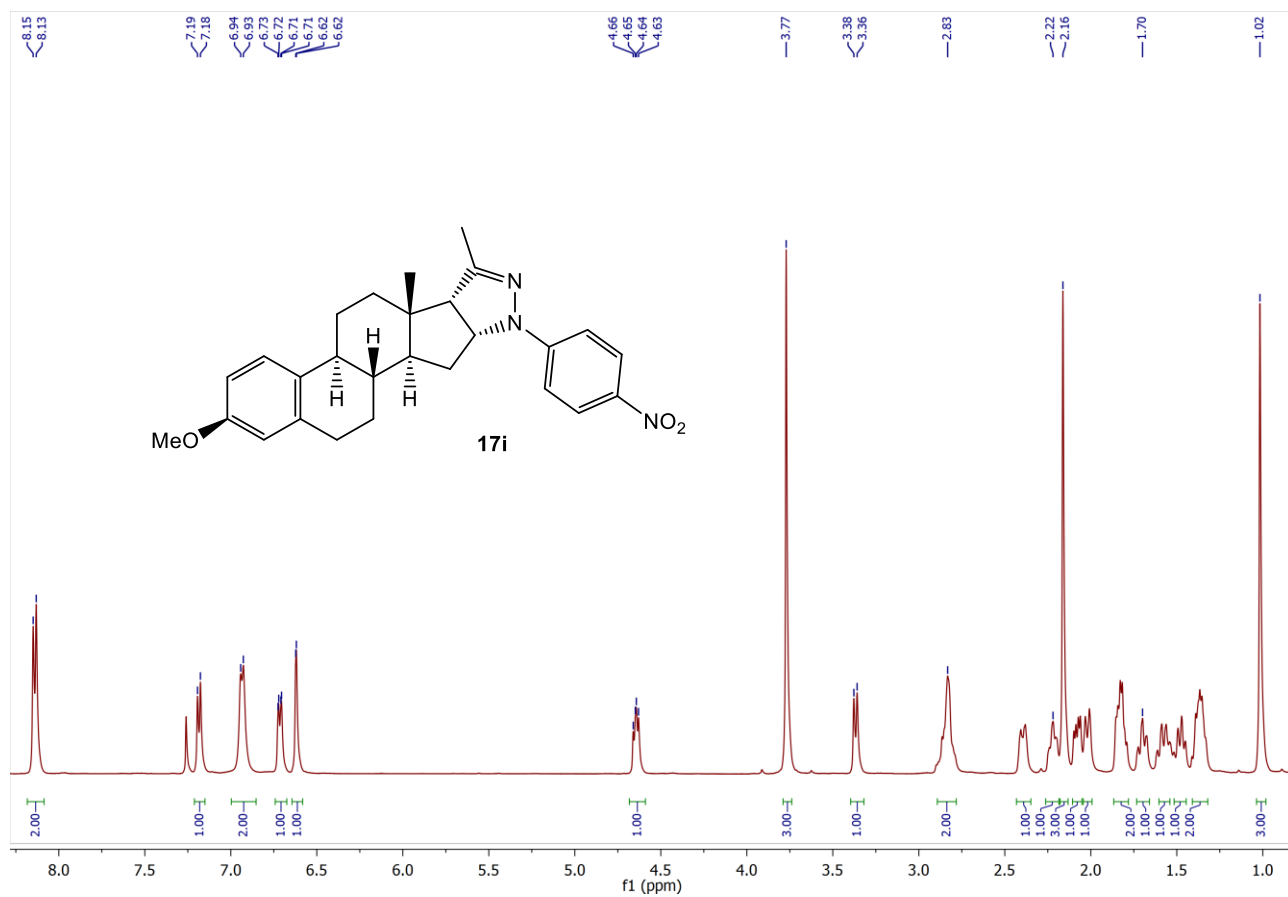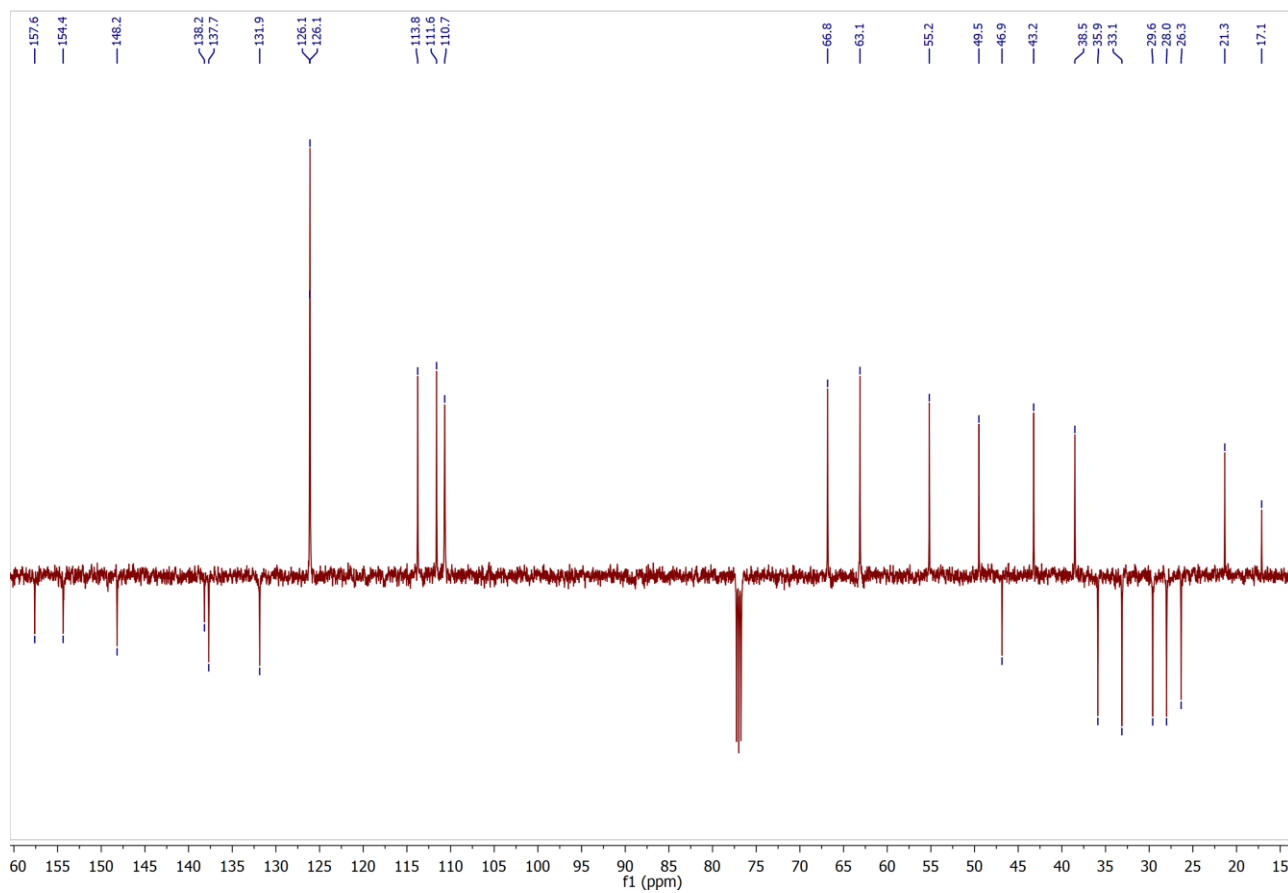

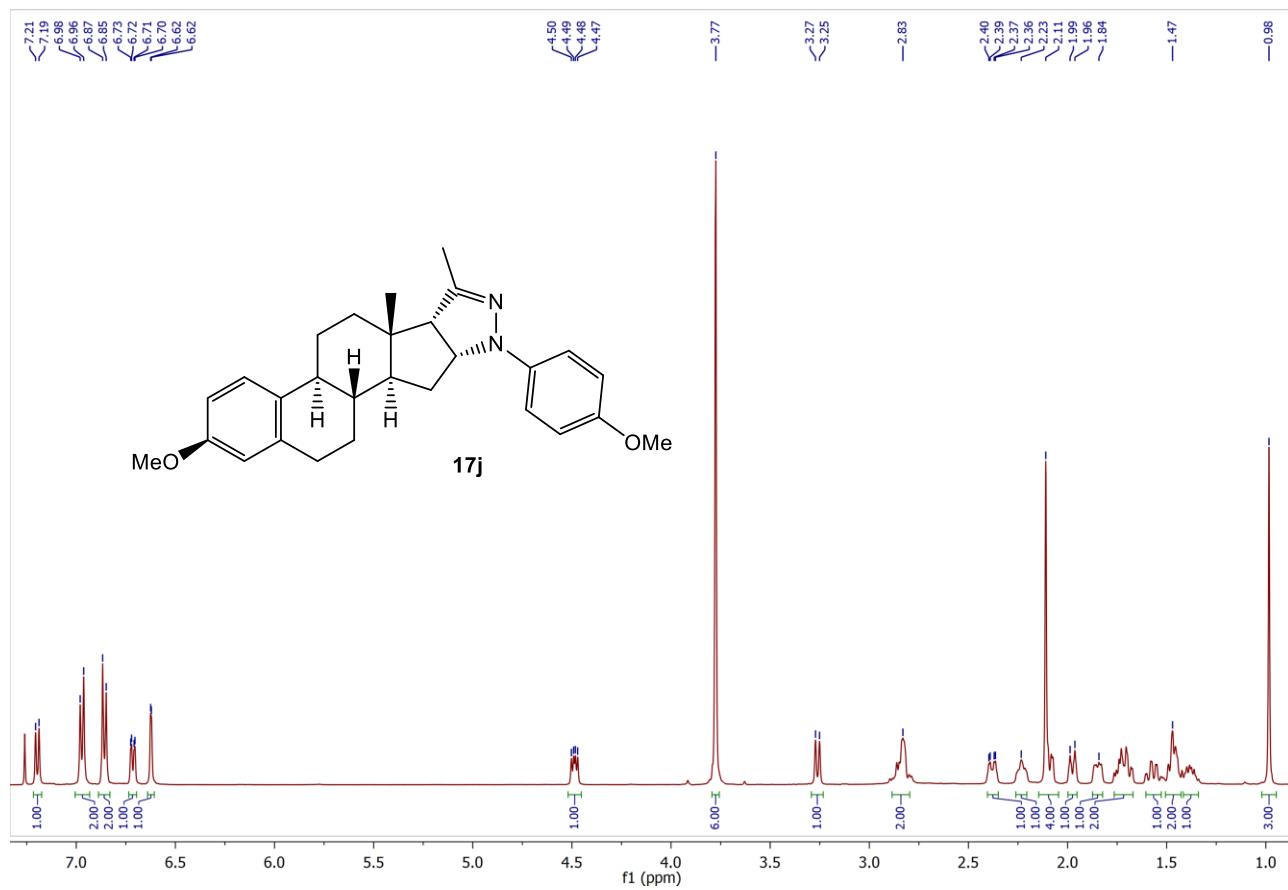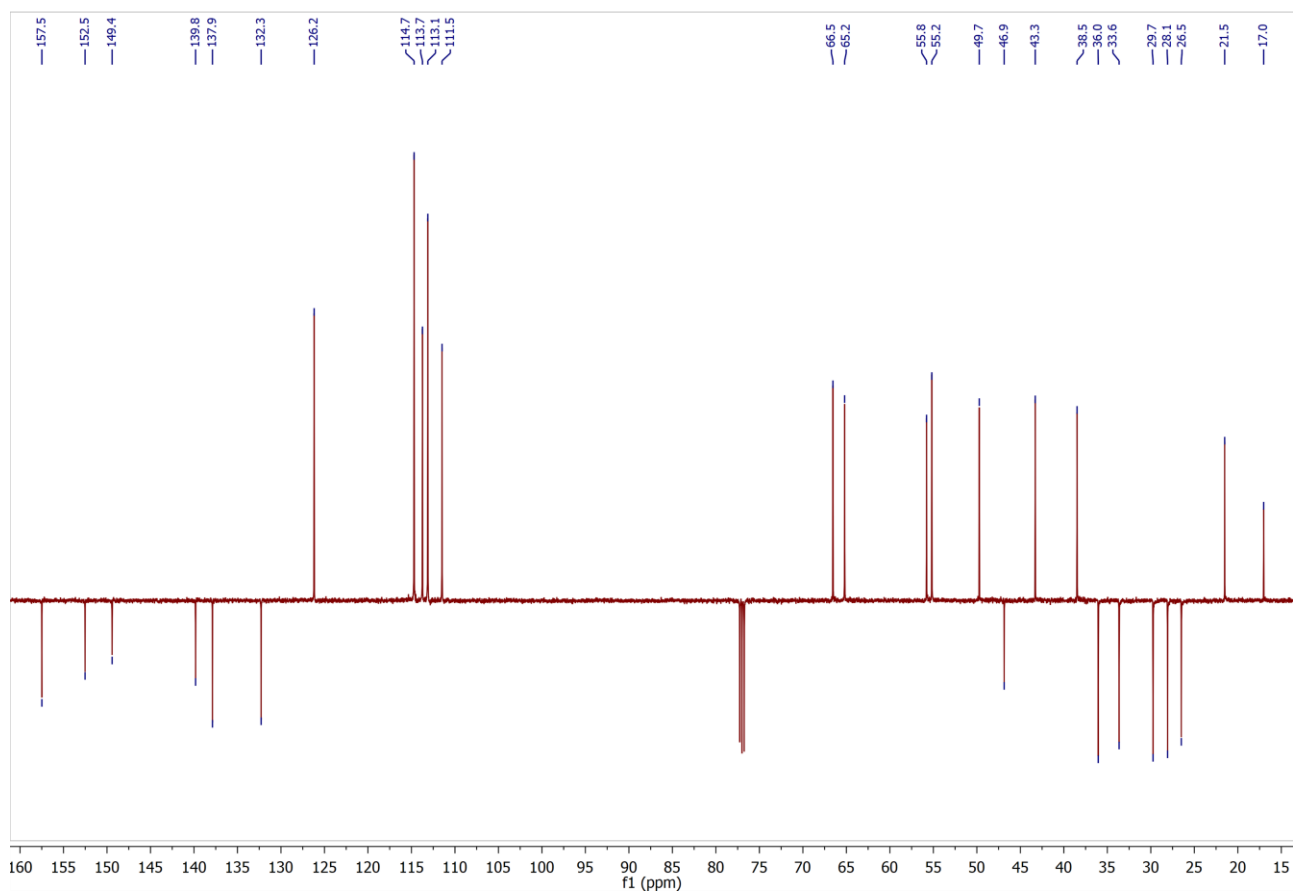HSQC spectrum of **17j**

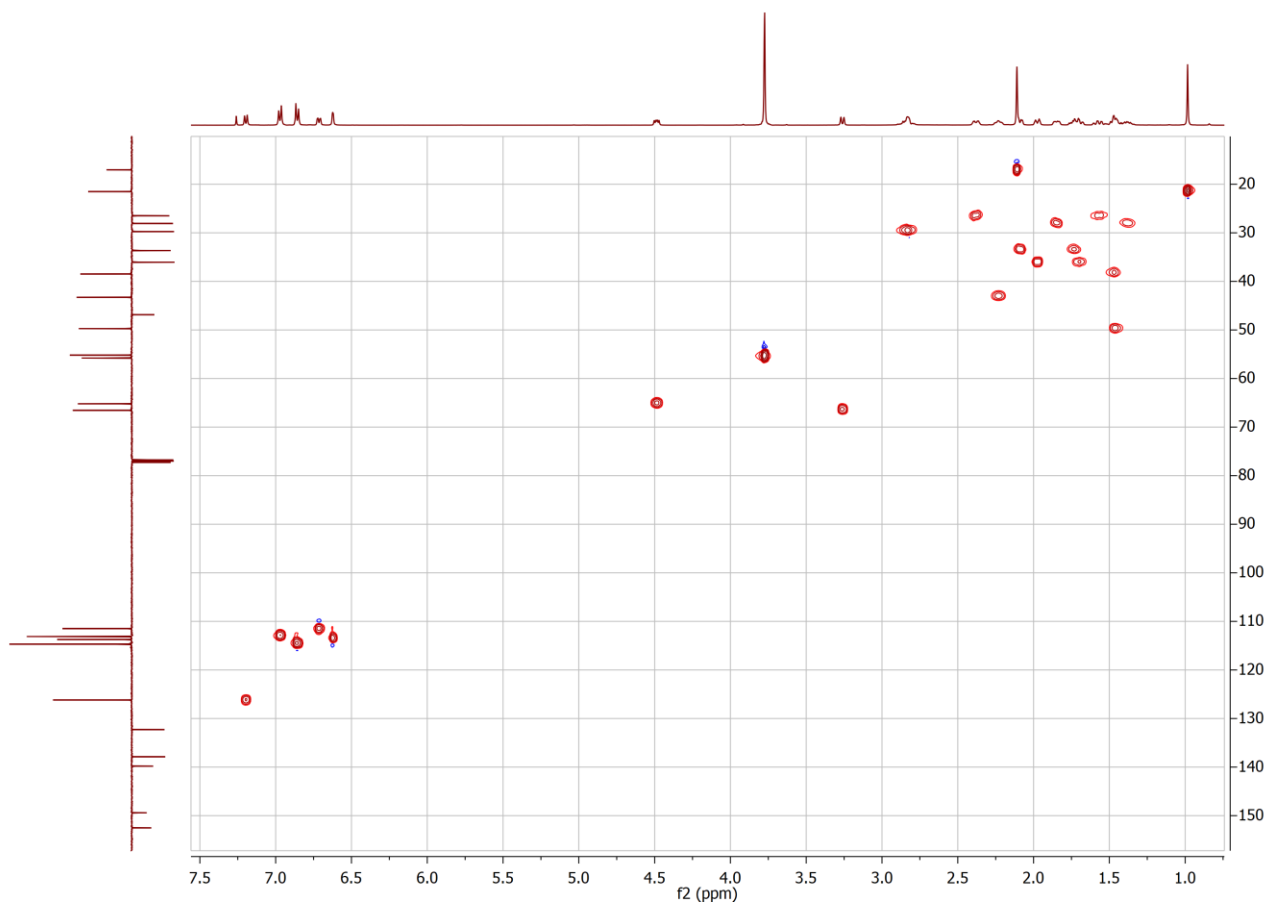HMBC spectrum of **17j**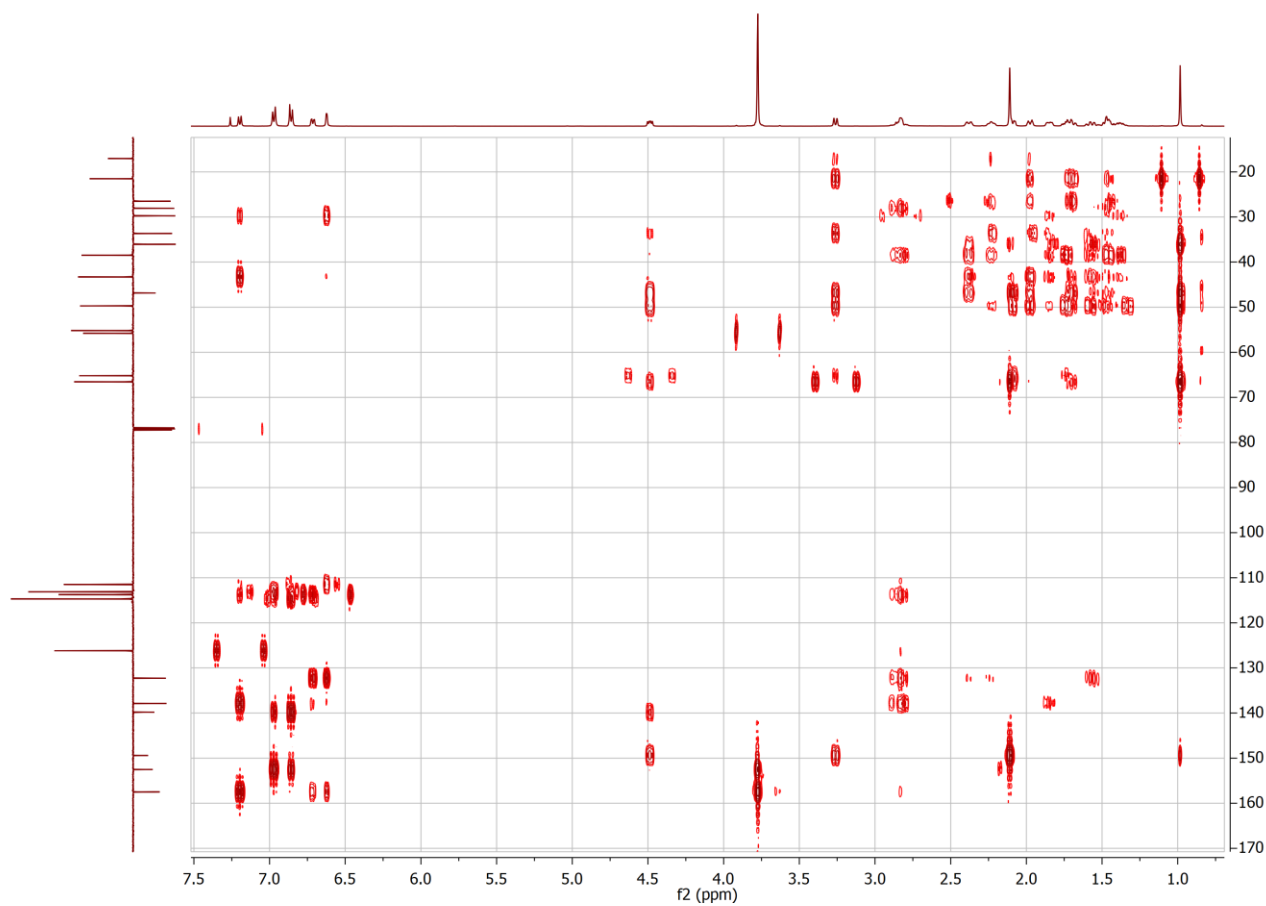NOESY spectrum of **17j**

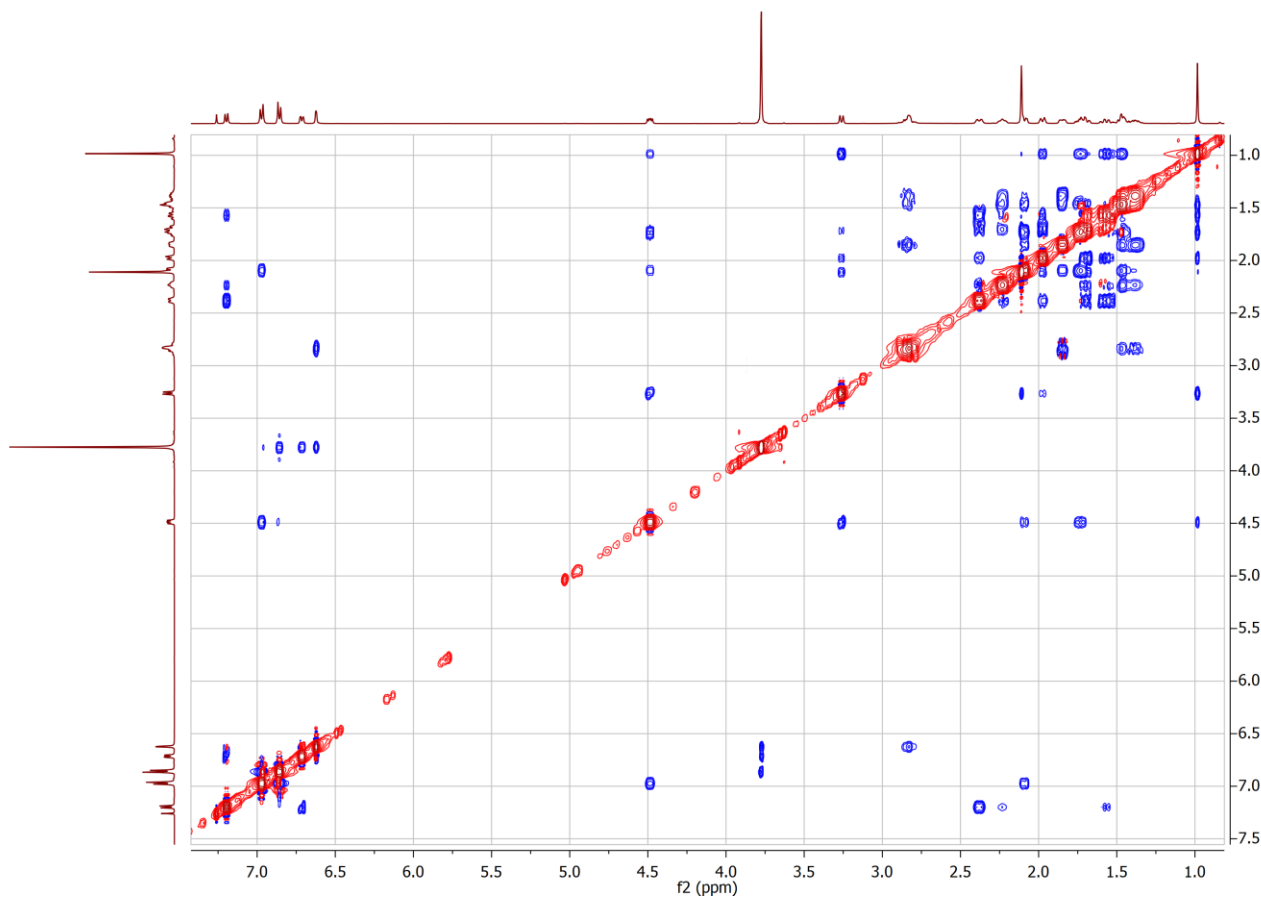COSY spectrum of **17j**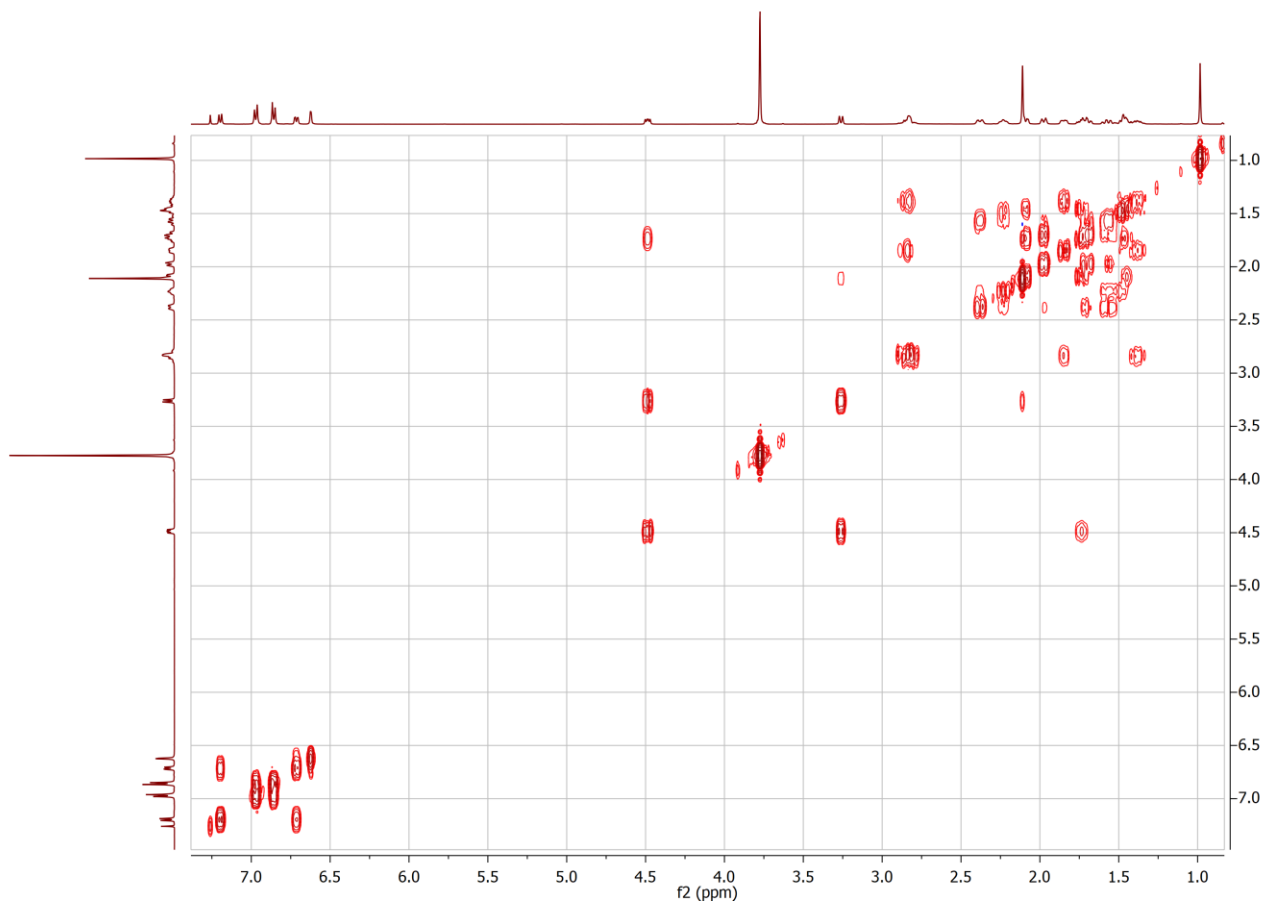

Supplement: s1 [file s1]
